# Supplementary material
Source: PubMed Central journal article supplement (PMC3967447)
Supplement: NIHMS329350-supplement-1_si_001.pdf [file NIHMS329350-supplement-1_si_001.pdf]

# Synthesis and Reactivity of Alkyl-1,1,1- Trisphosphonate Esters

Jacqueline P. Smits and David F. Wiemer\*

*Department of Chemistry, University of Iowa, Iowa City, Iowa 52242-1294*

## Supplemental Table of Contents

|                                                                                   |     |
|-----------------------------------------------------------------------------------|-----|
| <sup>1</sup> H NMR for compound <b>7</b> (300 MHz)                                | S3  |
| <sup>1</sup> H NMR for compound <b>10</b> (300 MHz)                               | S4  |
| <sup>13</sup> C NMR for compound <b>10</b> (100 MHz)                              | S5  |
| <sup>1</sup> H NMR for compound <b>11</b> (300 MHz)                               | S6  |
| <sup>13</sup> C NMR for compound <b>11</b> (75 MHz)                               | S7  |
| <sup>1</sup> H NMR for compound <b>12</b> (300 MHz)                               | S8  |
| <sup>13</sup> C NMR for compound <b>12</b> (75 MHz)                               | S9  |
| <sup>1</sup> H NMR for compound <b>13</b> (300 MHz)                               | S10 |
| <sup>13</sup> C NMR for compound <b>13</b> (75 MHz)                               | S11 |
| <sup>1</sup> H NMR for tetraethyl 6-hepten-1,1-bisphosphonate (300 MHz)           | S12 |
| <sup>13</sup> C NMR for tetraethyl 6-hepten-1,1-bisphosphonate (75 MHz)           | S13 |
| <sup>1</sup> H NMR for compound <b>14</b> (300 MHz)                               | S14 |
| <sup>13</sup> C NMR for compound <b>14</b> (75 MHz)                               | S15 |
| <sup>1</sup> H NMR for compound <b>15</b> (300 MHz)                               | S16 |
| <sup>13</sup> C NMR for compound <b>15</b> (75 MHz)                               | S17 |
| <sup>1</sup> H NMR for compound <b>16</b> (300 MHz)                               | S18 |
| <sup>13</sup> C NMR for compound <b>16</b> (75 MHz)                               | S19 |
| <sup>1</sup> H NMR for compound <b>19</b> (300 MHz)                               | S20 |
| <sup>13</sup> C NMR for compound <b>19</b> (75 MHz)                               | S21 |
| <sup>1</sup> H NMR for the mixture of compounds <b>20</b> and <b>12</b> (300 MHz) | S22 |
| <sup>13</sup> C NMR for the mixture of compounds <b>20</b> and <b>12</b> (75 MHz) | S23 |
| <sup>1</sup> H NMR for compound <b>20</b> (500 MHz)                               | S24 |
| <sup>13</sup> C NMR for compound <b>20</b> (125 MHz)                              | S25 |
| <sup>1</sup> H NMR for compound <b>21</b> (300 MHz)                               | S26 |

\*Corresponding author. Tel: 319-335-1365; Fax: 319-335-1270; e-mail: [david-wiemer@uiowa.edu](mailto:david-wiemer@uiowa.edu)

|                                                     |     |
|-----------------------------------------------------|-----|
| <sup>13</sup> C NMR for compound <b>21</b> (75 MHz) | S27 |
| <sup>1</sup> H NMR for compound <b>22</b> (300 MHz) | S28 |
| <sup>13</sup> C NMR for compound <b>22</b> (75 MHz) | S29 |
| <sup>1</sup> H NMR for compound <b>23</b> (300 MHz) | S30 |
| <sup>13</sup> C NMR for compound <b>23</b> (75 MHz) | S31 |
| <sup>1</sup> H NMR for compound <b>24</b> (300 MHz) | S32 |
| <sup>13</sup> C NMR for compound <b>24</b> (75 MHz) | S33 |
| pH Titration of Compound <b>7</b> with NaOH         | S34 |

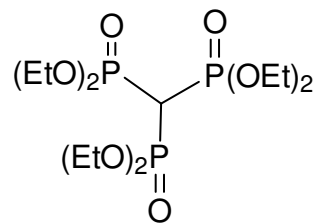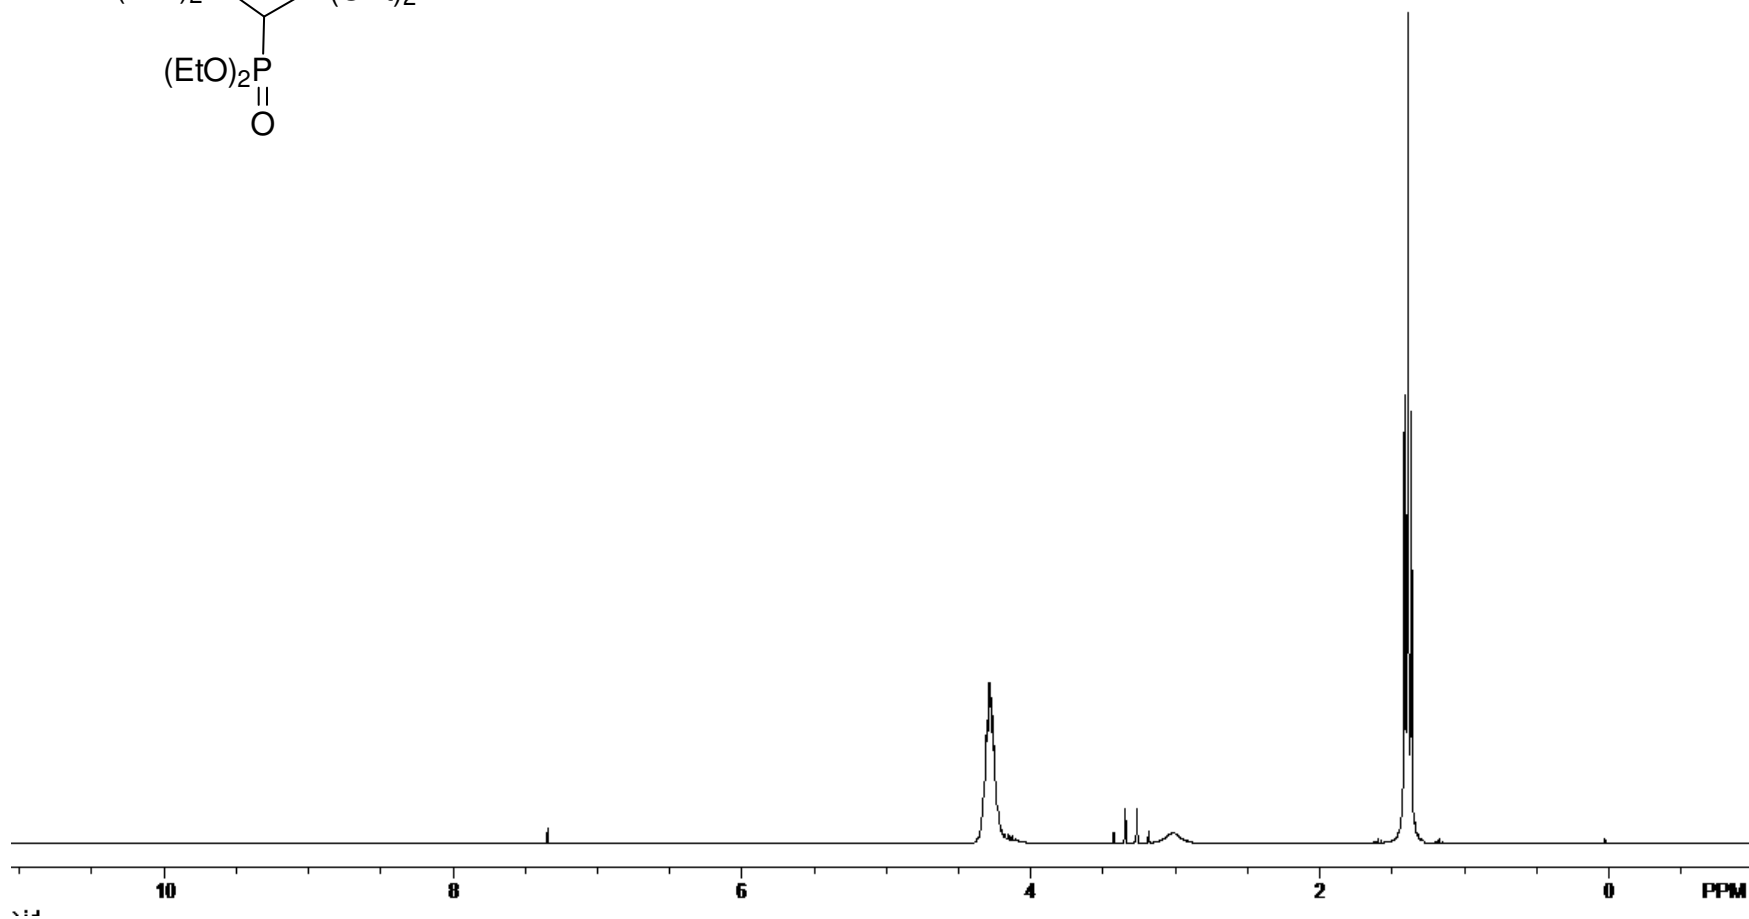

300 MHz  $^1\text{H}$  NMR spectrum of methylidynetrisphosphonic acid, hexaethyl ester (**7**). The resonances at 3.31 ppm and at 3.01 ppm are exchanged upon addition of  $\text{D}_2\text{O}$ .

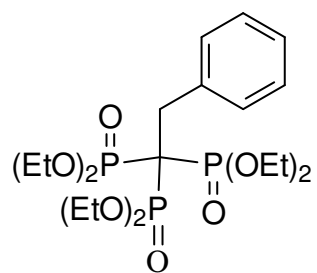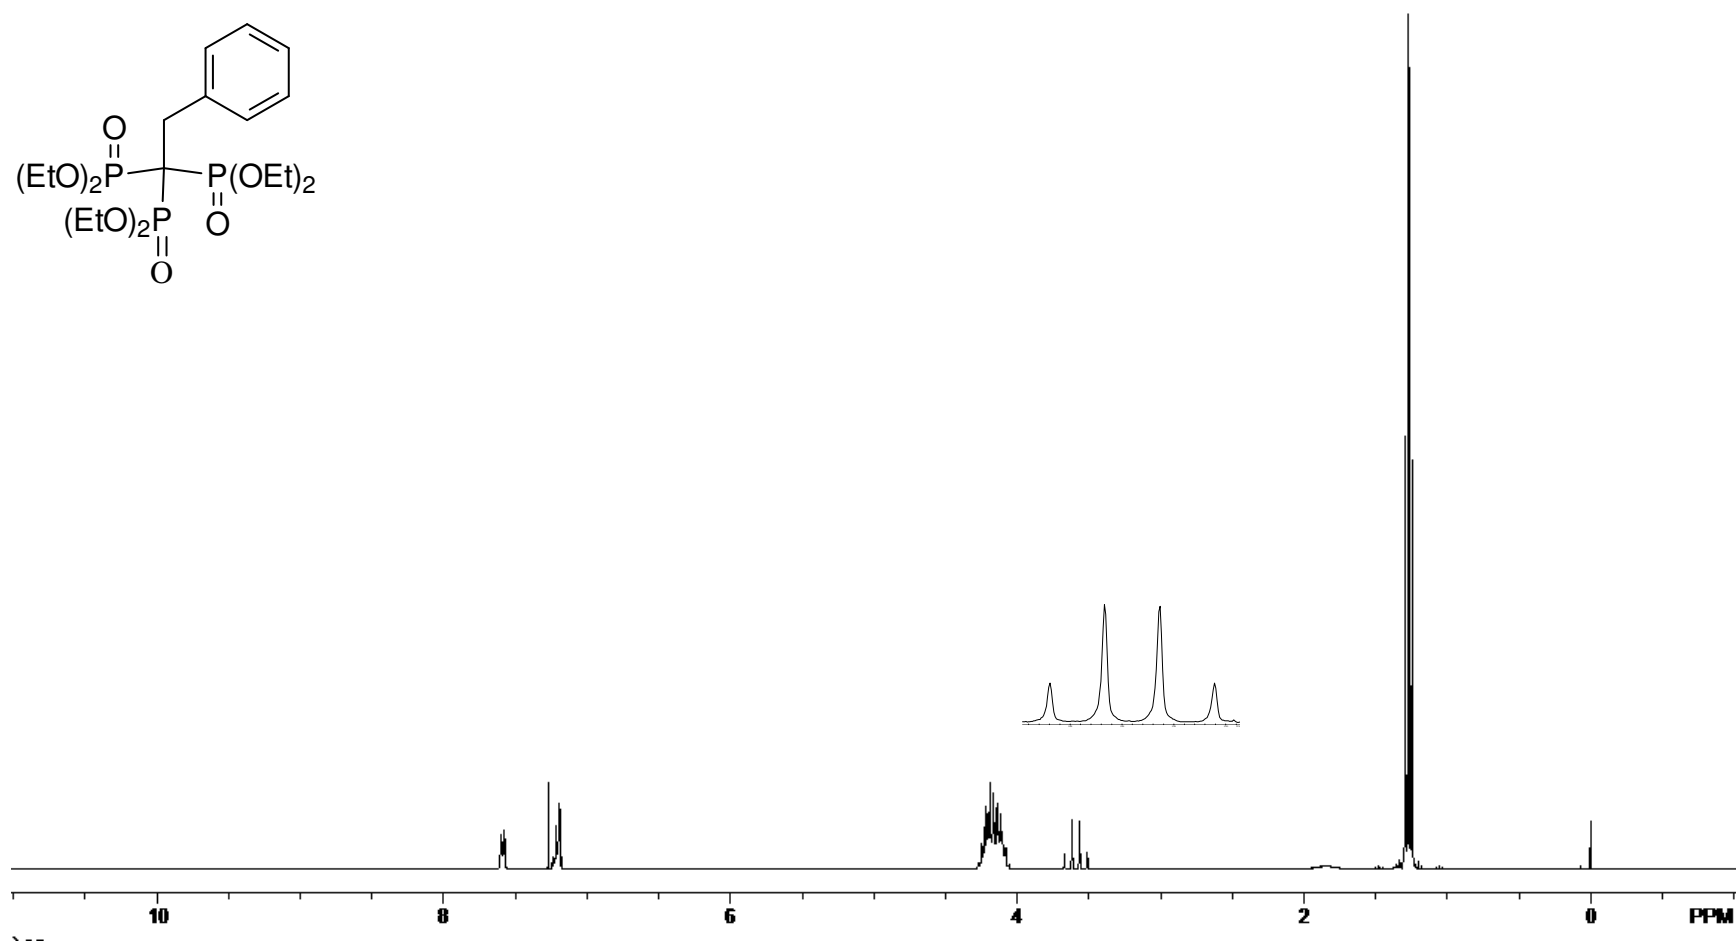

300 MHz  $^1\text{H}$  NMR spectrum of 2-phenylethylidynetrisphosphonic acid, hexaethyl ester (**10**).

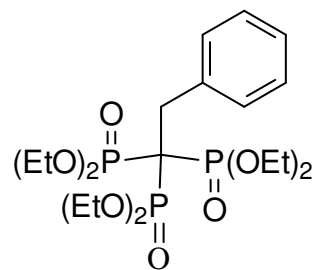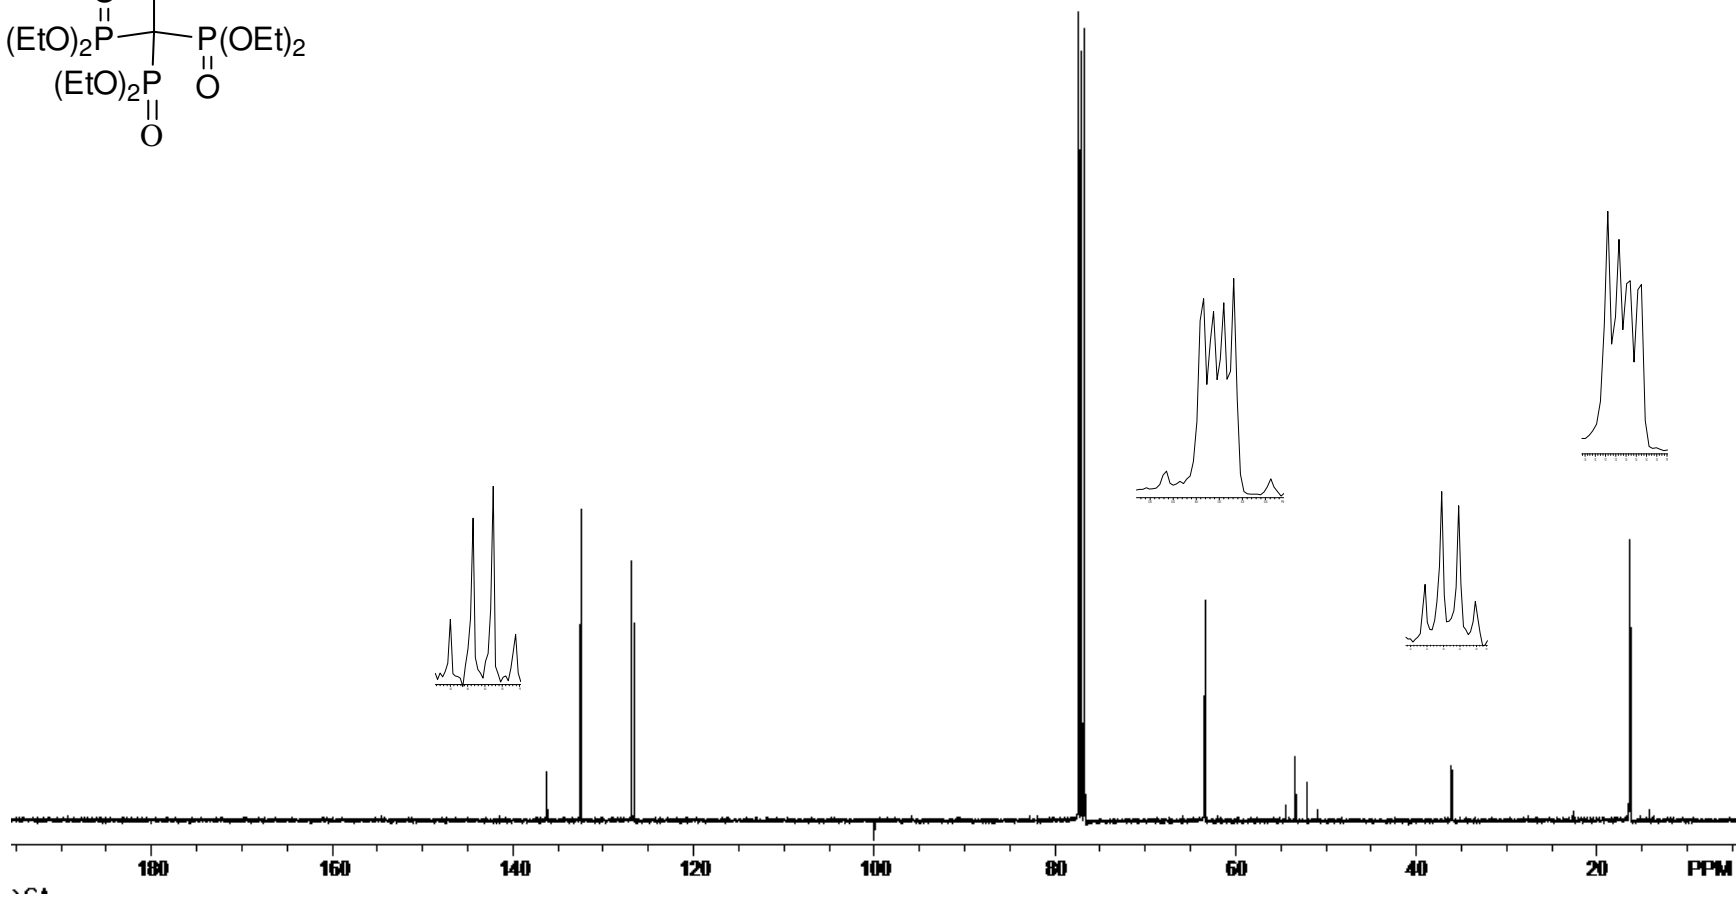

100 MHz  $^{13}\text{C}$  NMR spectrum of 2-phenylethylidynetrisphosphonic acid, hexaethyl ester (**10**).

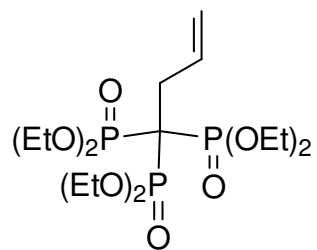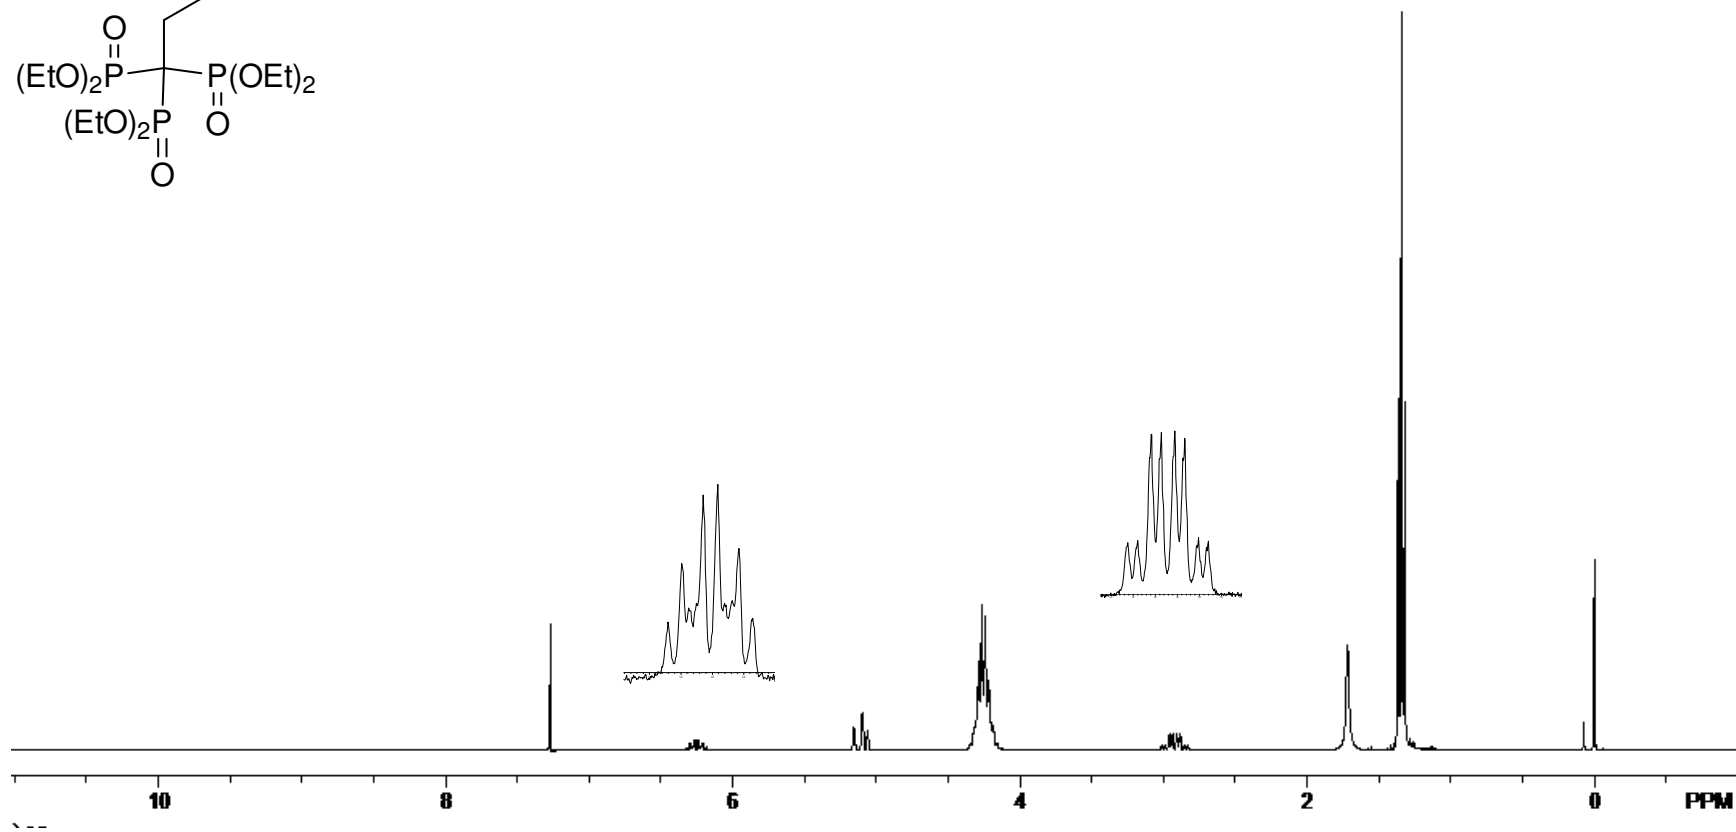

300 MHz <sup>1</sup>H NMR spectrum of 3-butenylidynetrisphosphonic acid, hexaethyl ester (**11**).

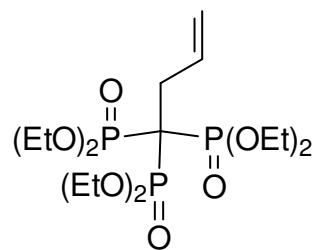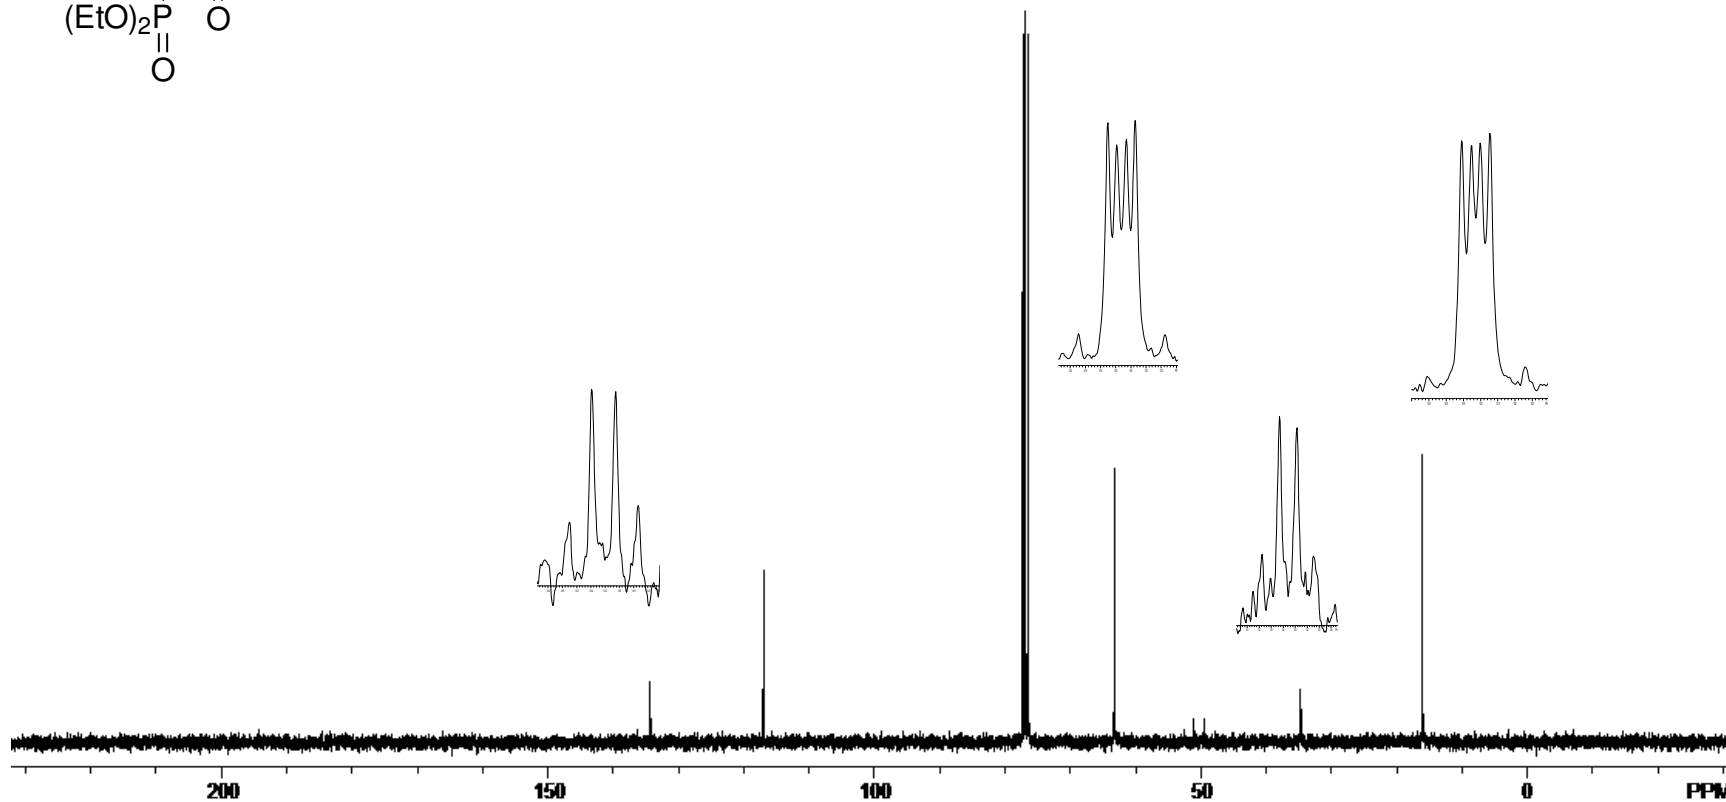

75 MHz  $^{13}\text{C}$  NMR spectrum of 3-butenylidynetrisphosphonic acid, hexaethyl ester (**11**).

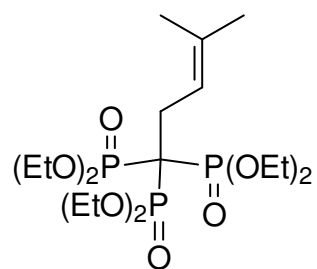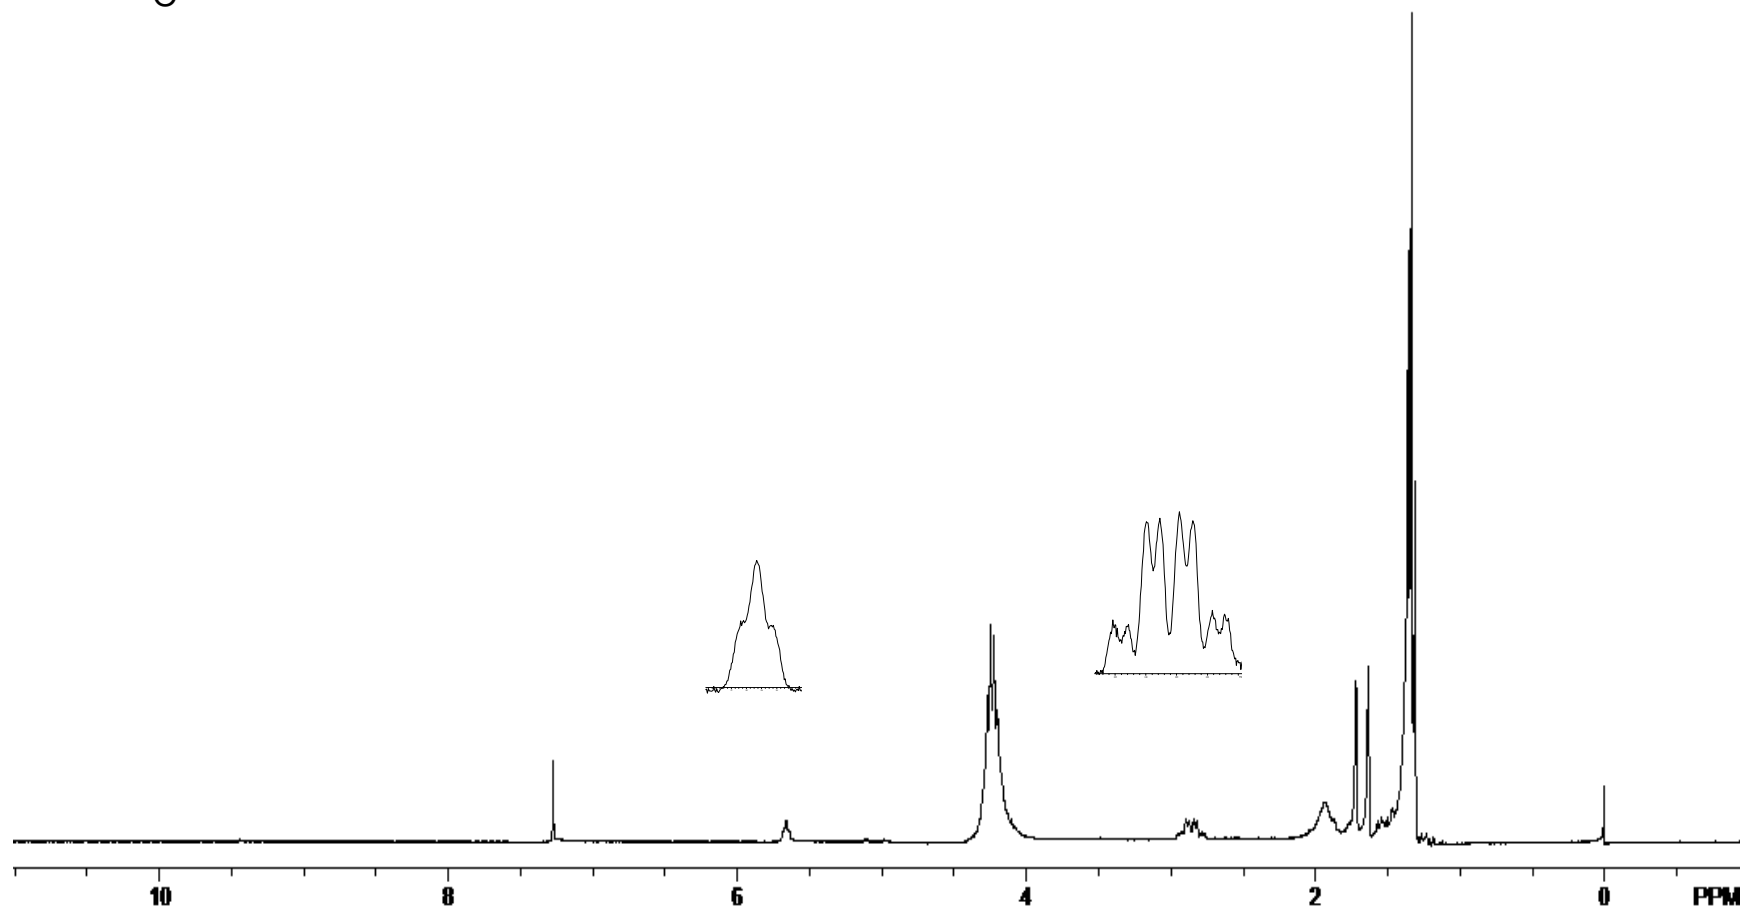

$^1\text{H}$  NMR spectrum of 4-methyl-3-pentenylidynetrisphosphonic acid, hexaethyl ester (**12**).



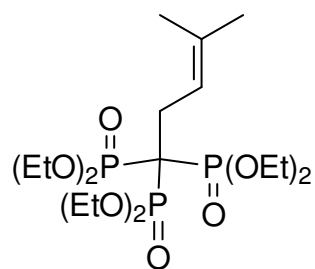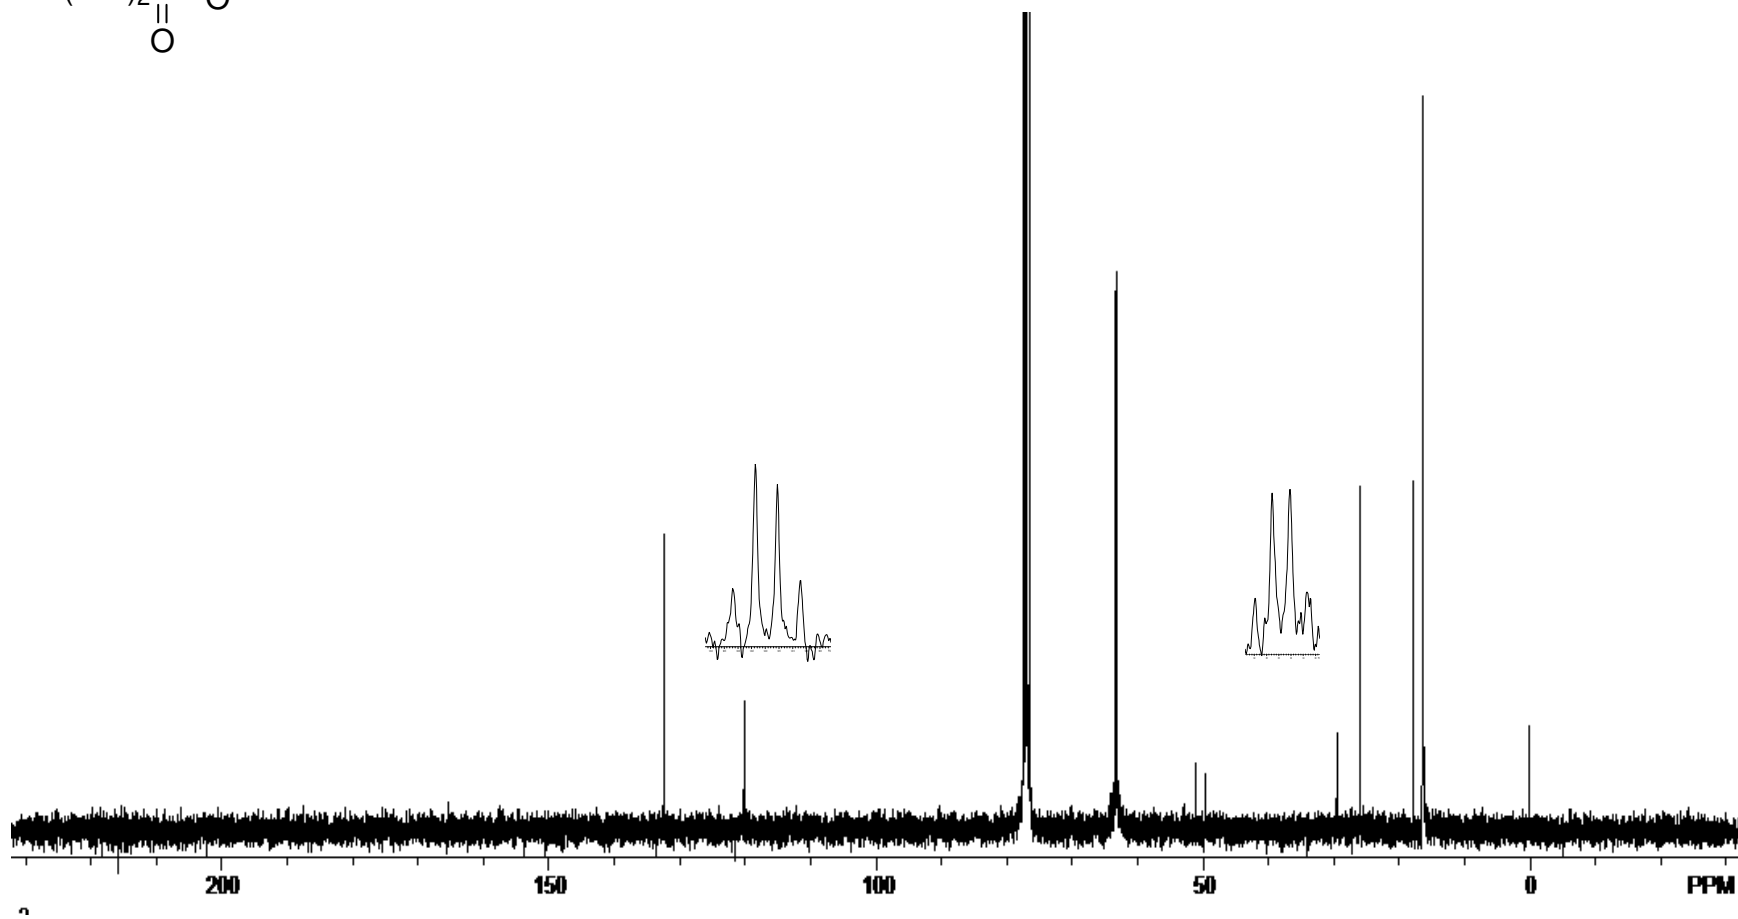

75 MHz  $^{13}\text{C}$  NMR spectrum of 4-methyl-3-pentenylidynetrisphosphonic acid, hexaethyl ester (**12**).

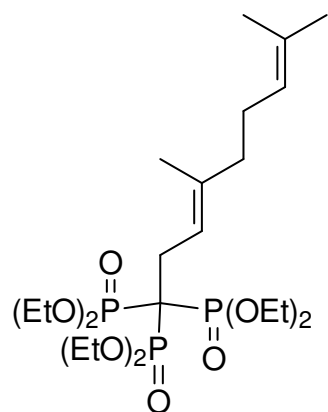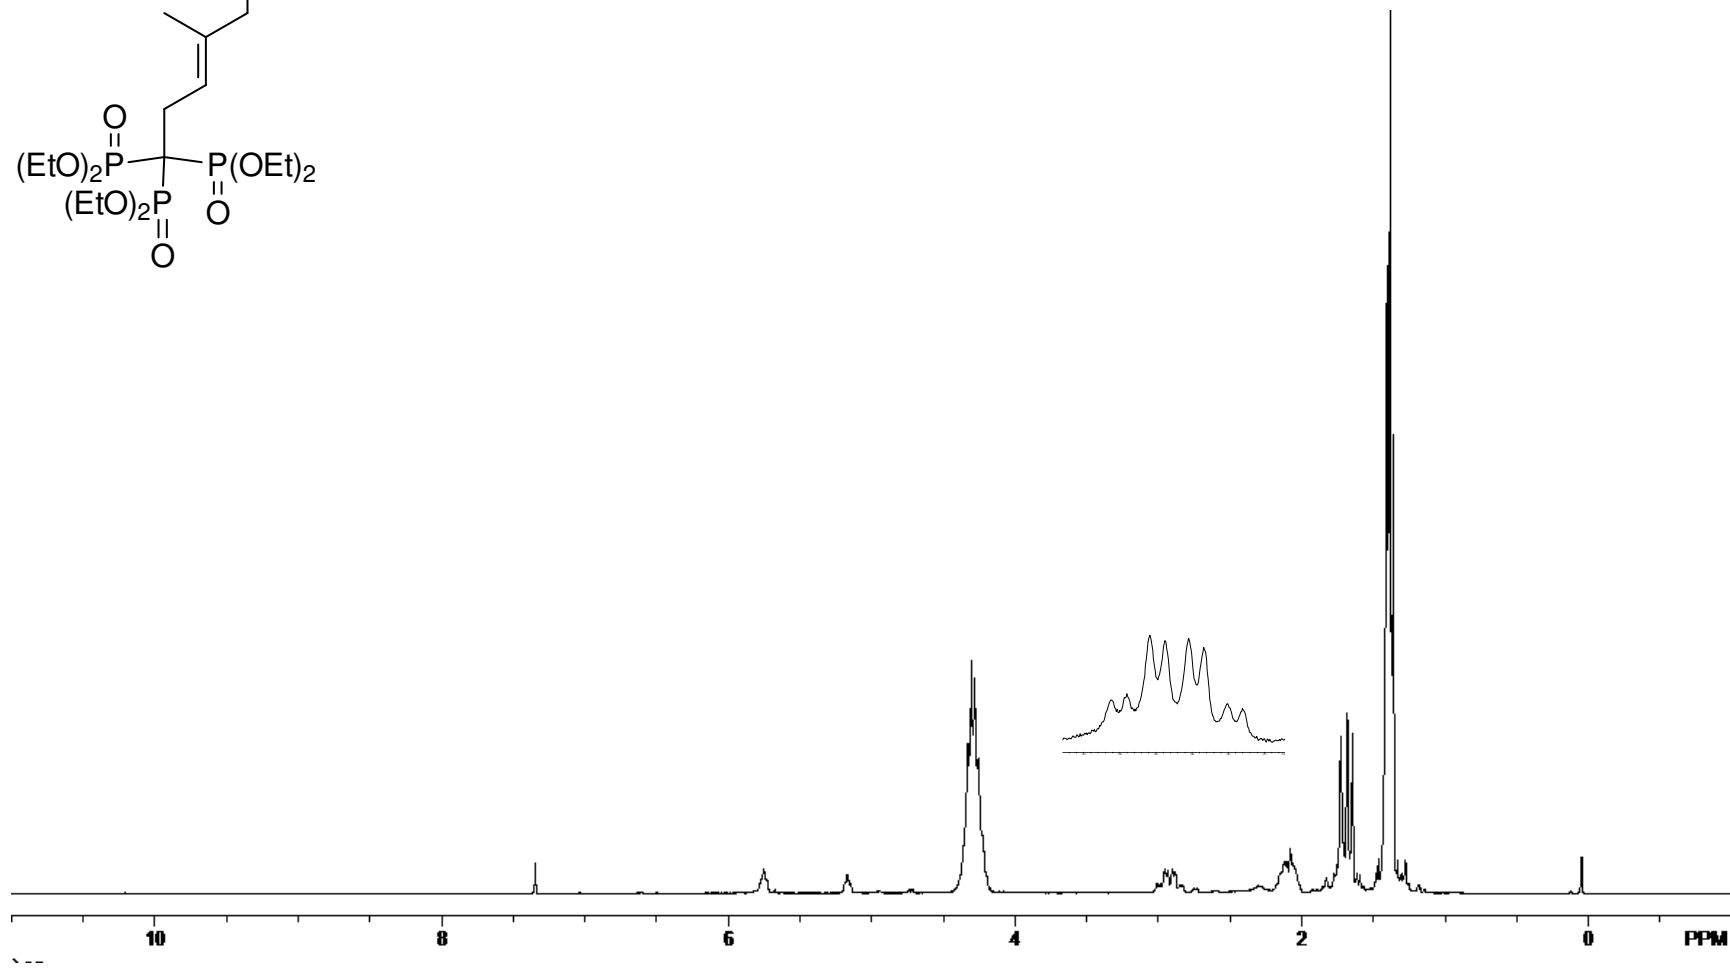

300 MHz  $^1\text{H}$  NMR spectrum of (*3E*)-4,9-dimethyl-3-nonadienyldynetrisphosphonic acid, hexaethyl ester (**13**).

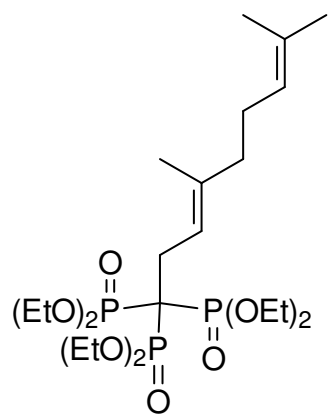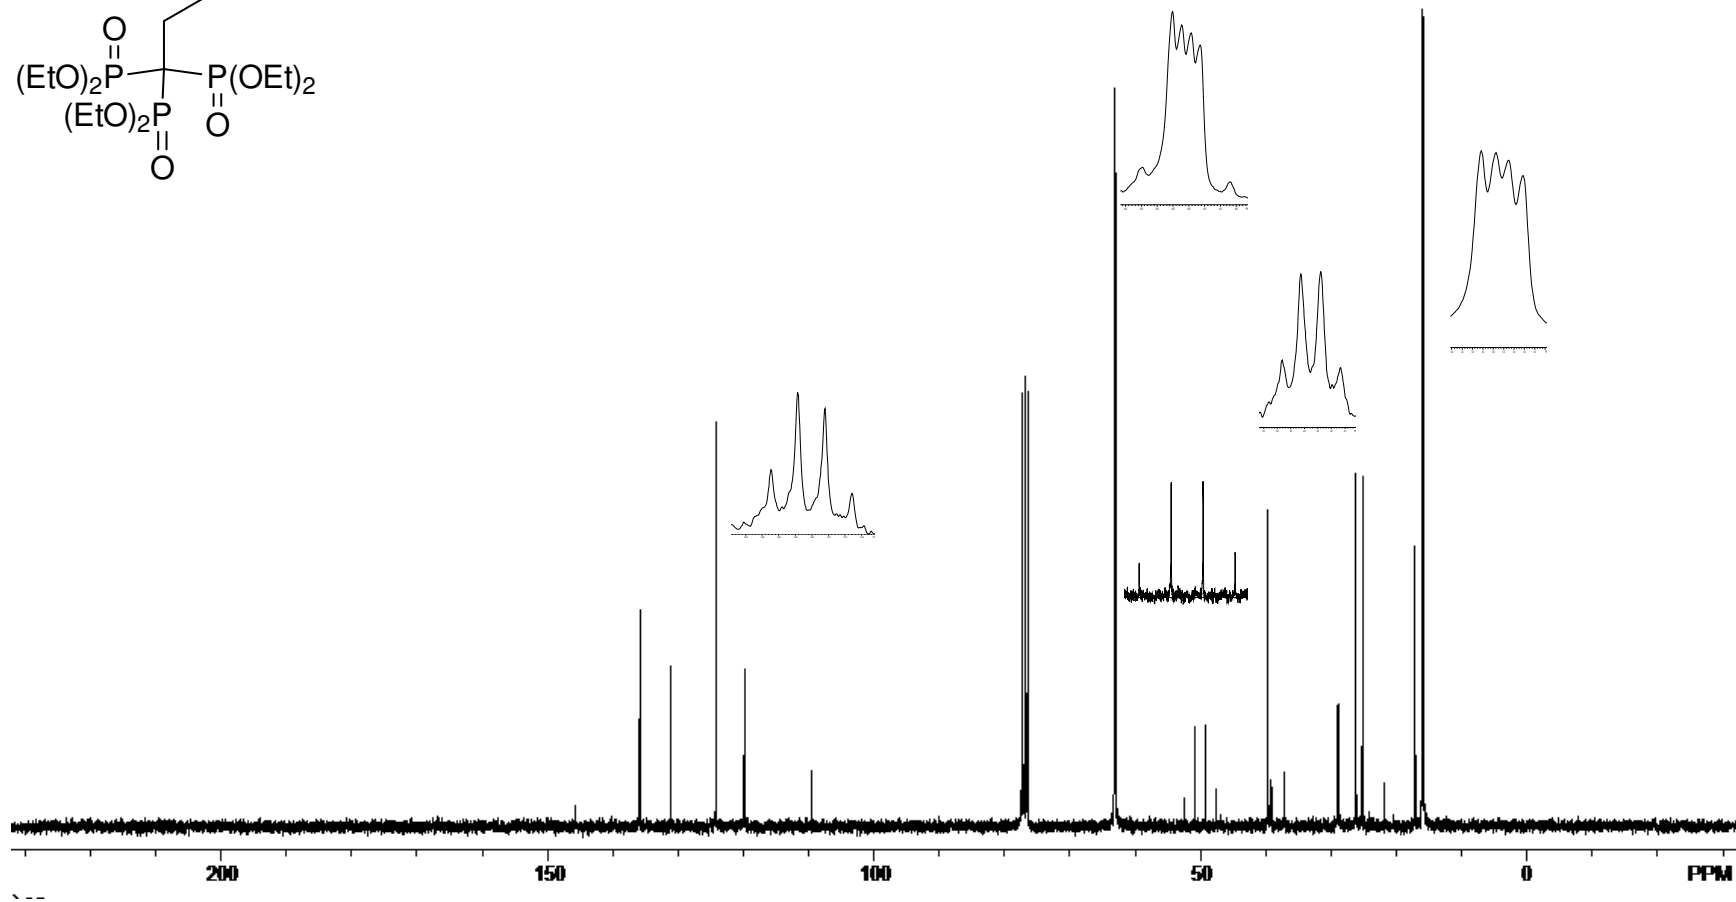

75 MHz  $^{13}\text{C}$  NMR spectrum of (3*E*)-4,9-dimethyl-3-nonadienyldinetrisphosphonic acid, hexaethyl ester (**13**).

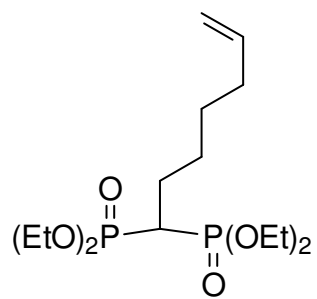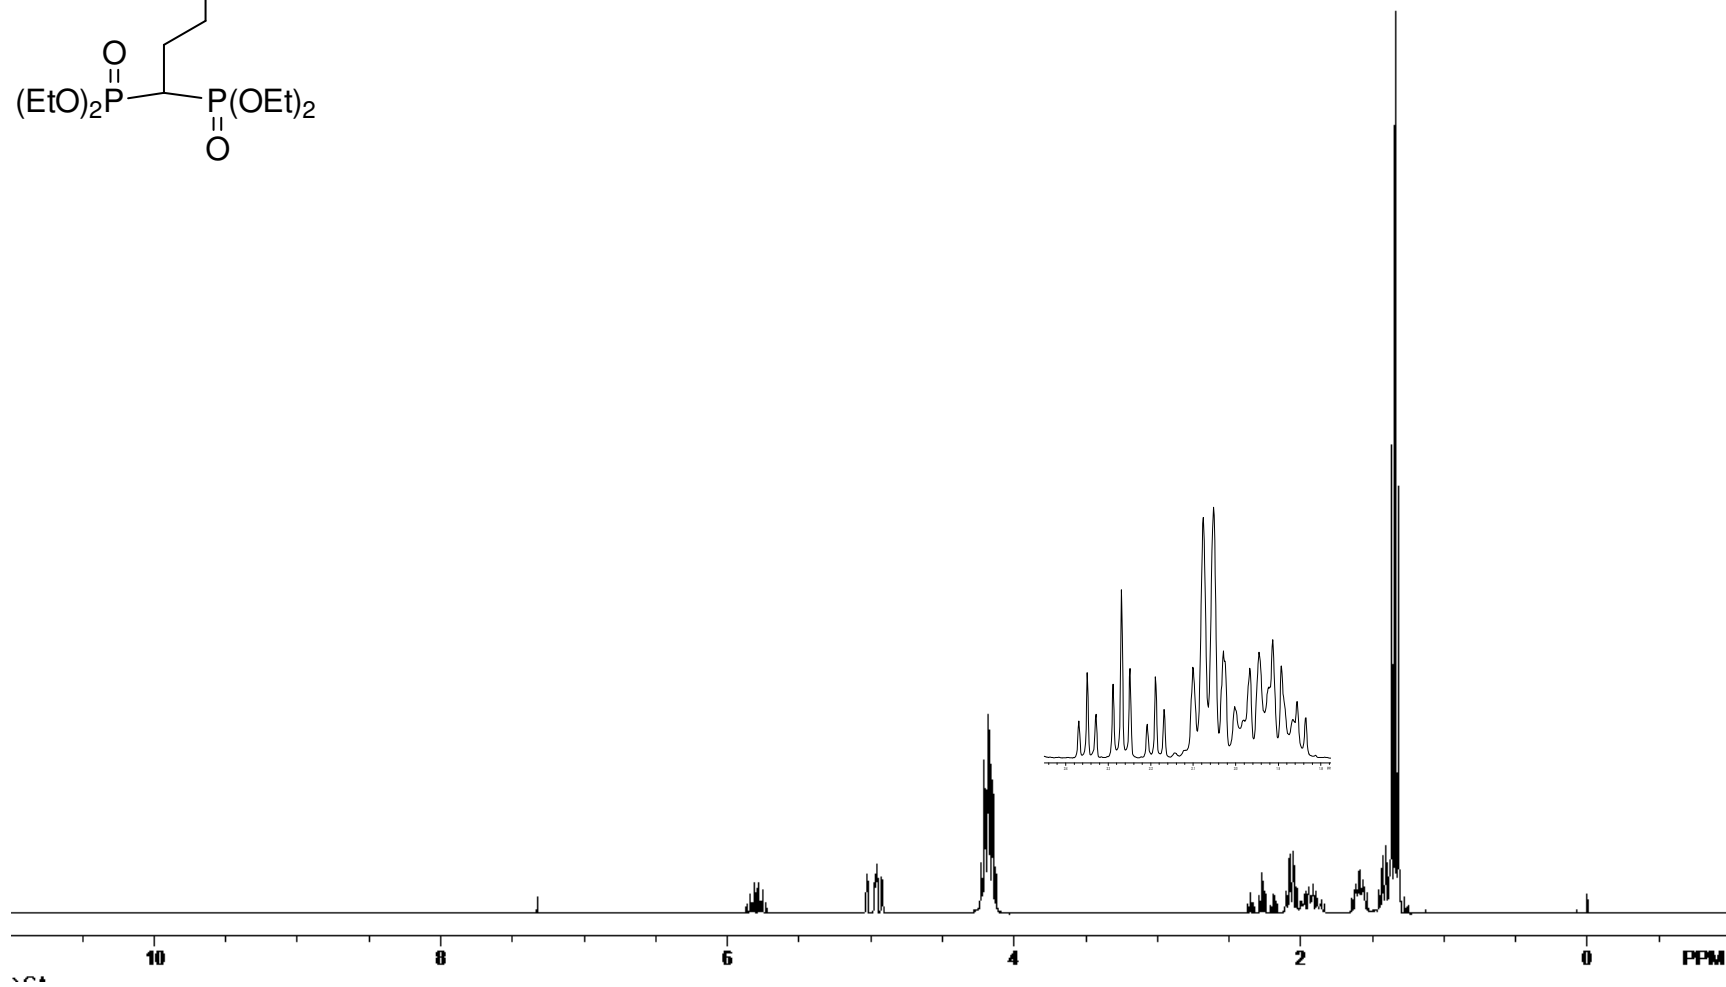

300 MHz <sup>1</sup>H NMR spectrum of tetraethyl 6-hepten-1,1-bisphosphonate.

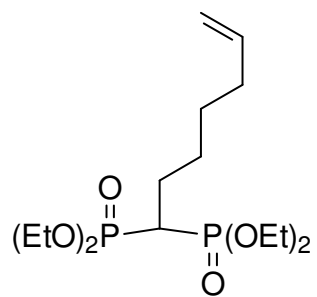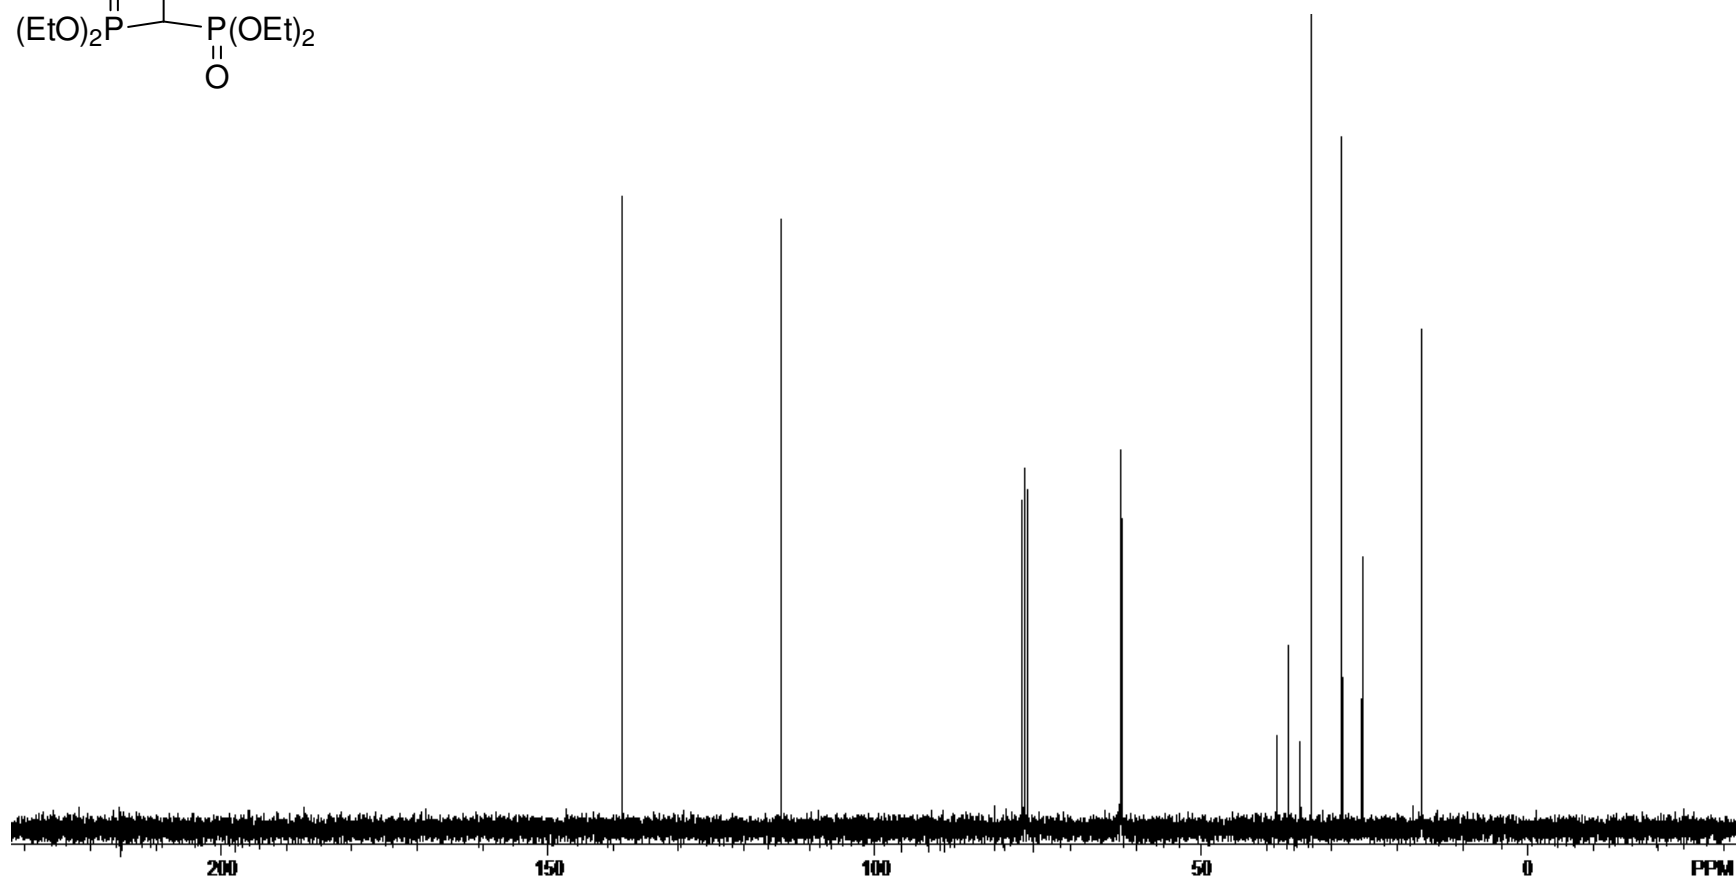

75 MHz  $^{13}\text{C}$  NMR spectrum of tetraethyl 6-hepten-1,1-bisphosphonate.

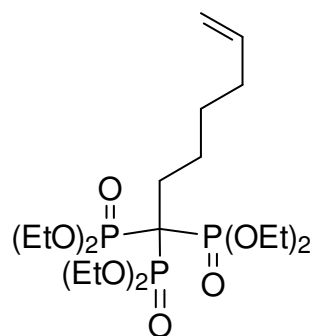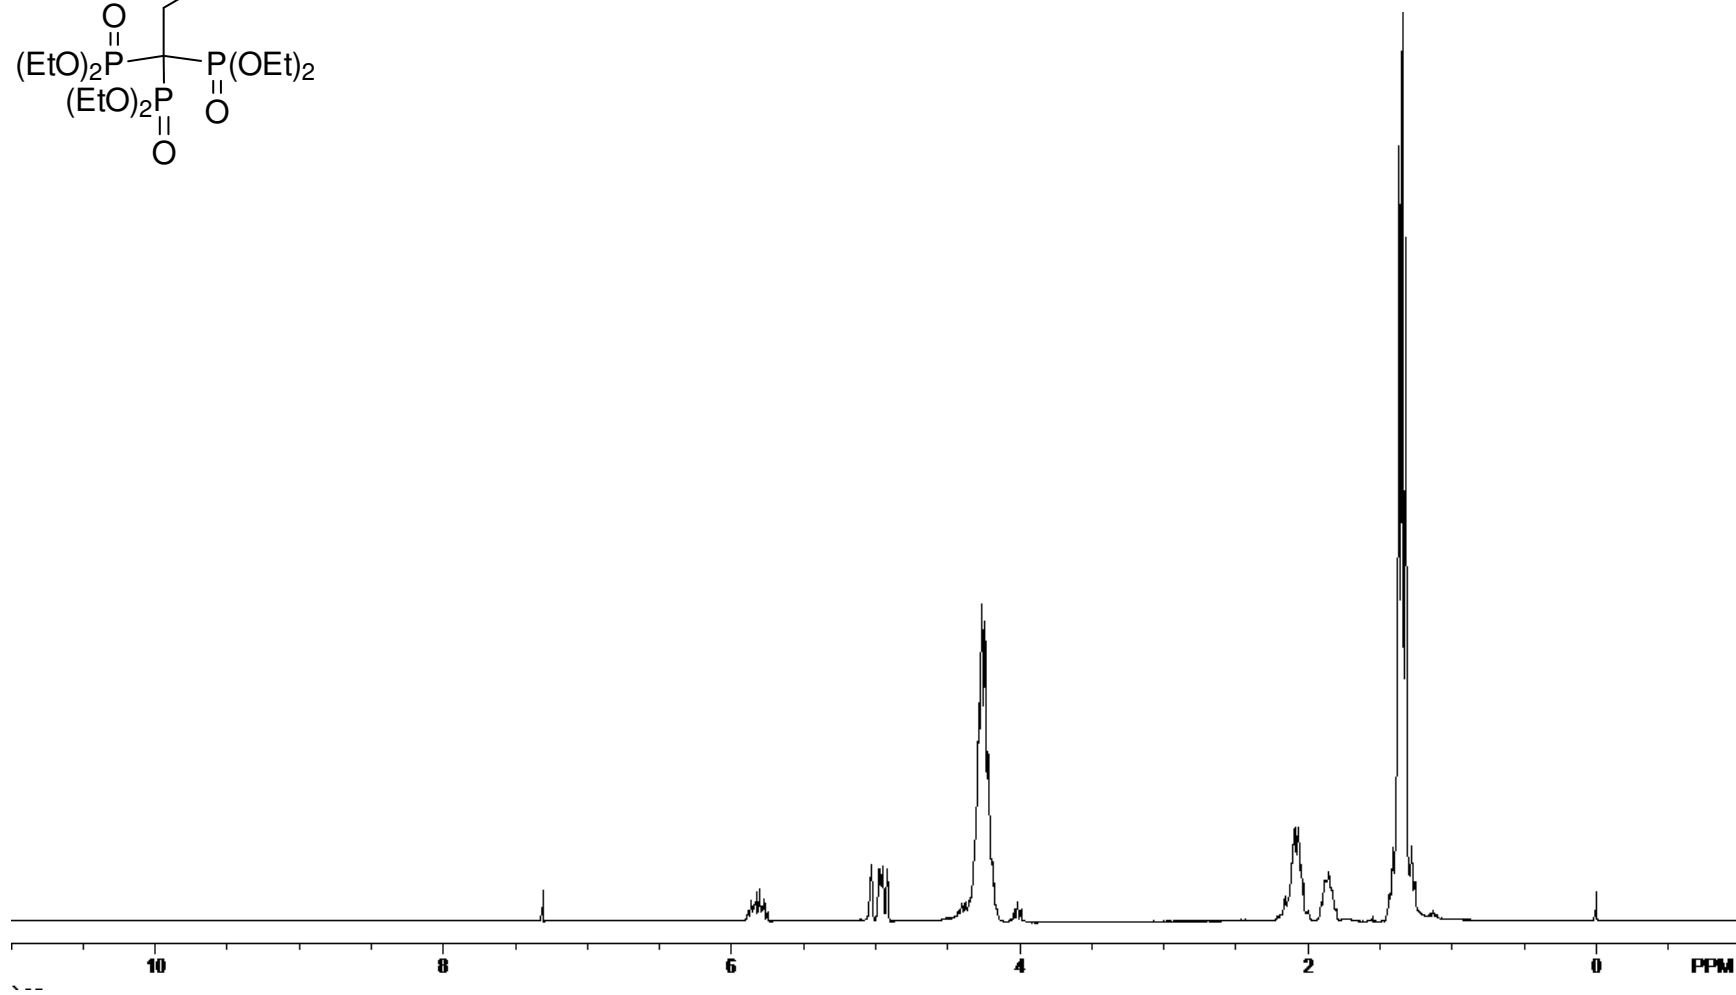

300 MHz  $^1\text{H}$  NMR spectrum of 6-heptenyldynetrakisphosphonic acid, hexaethyl ester (**14**).

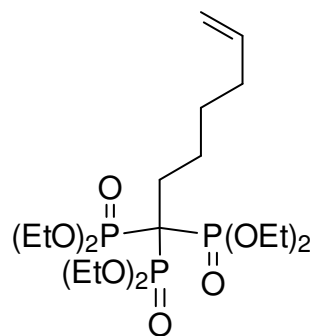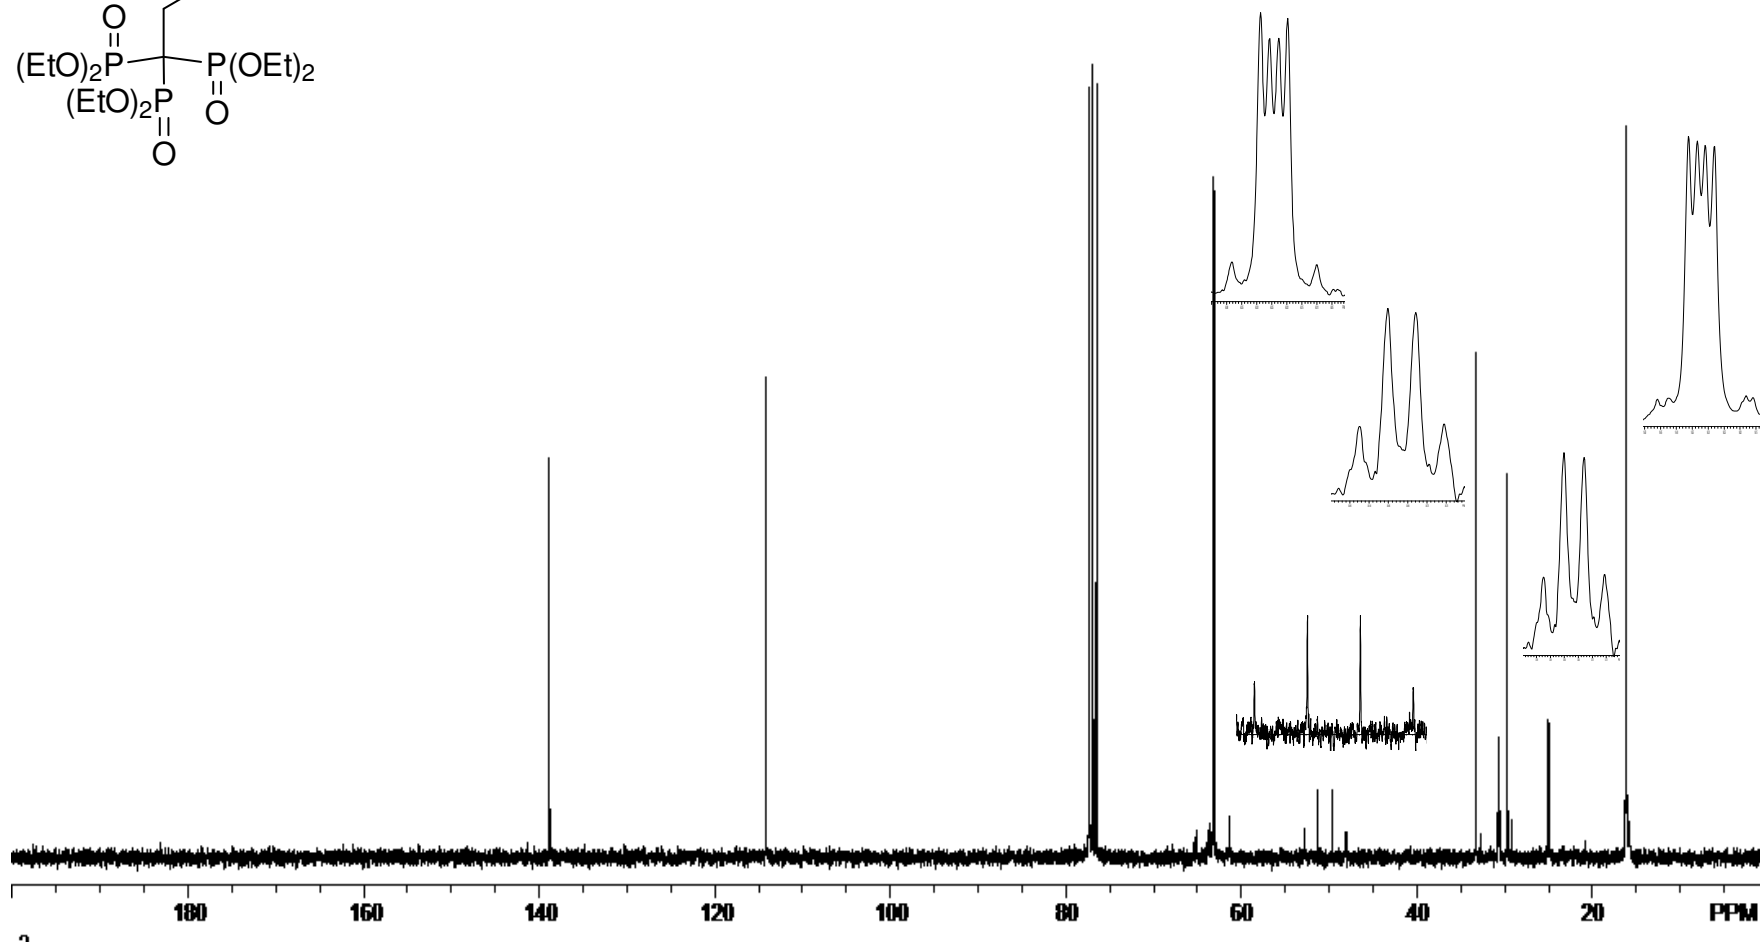

75 MHz  $^{13}\text{C}$  NMR spectrum of 6-heptenyldynetrakisphosphonic acid, hexaethyl ester (14).

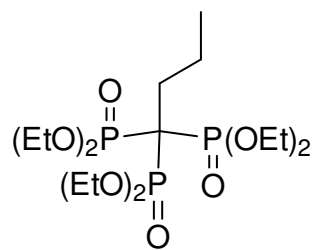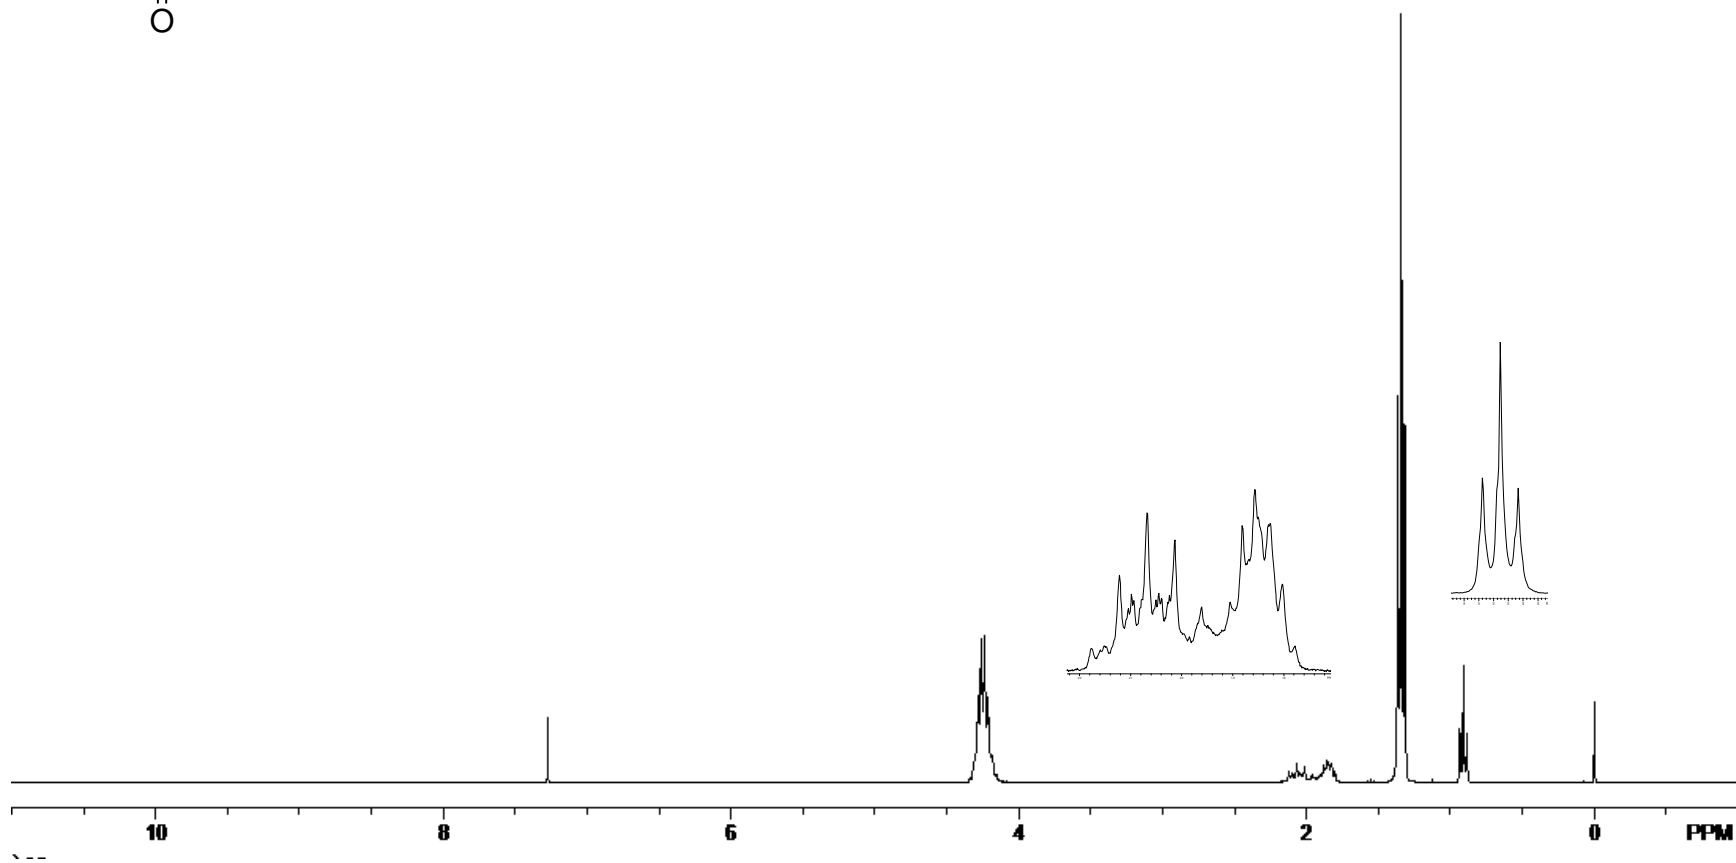

300 MHz <sup>1</sup>H NMR spectrum of butylidynetrisphosphonic acid, hexaethyl ester (**15**).



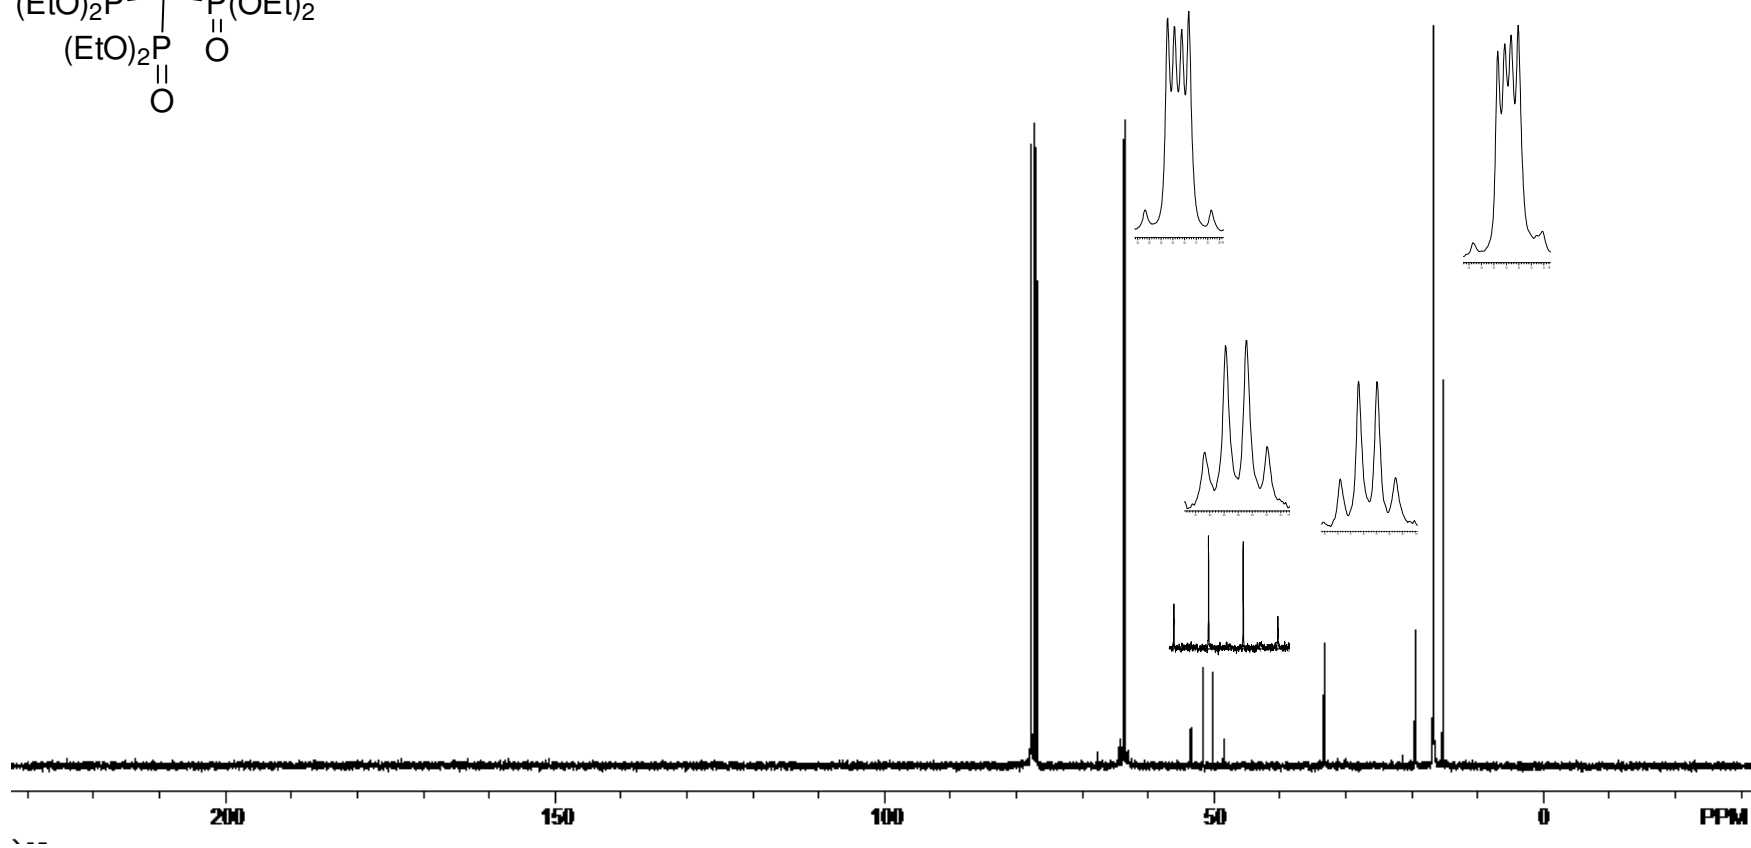

75 MHz <sup>13</sup>C NMR spectrum of butylidynetrisphosphonic acid, hexaethyl ester (**15**).

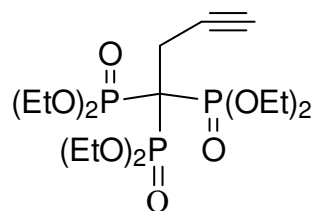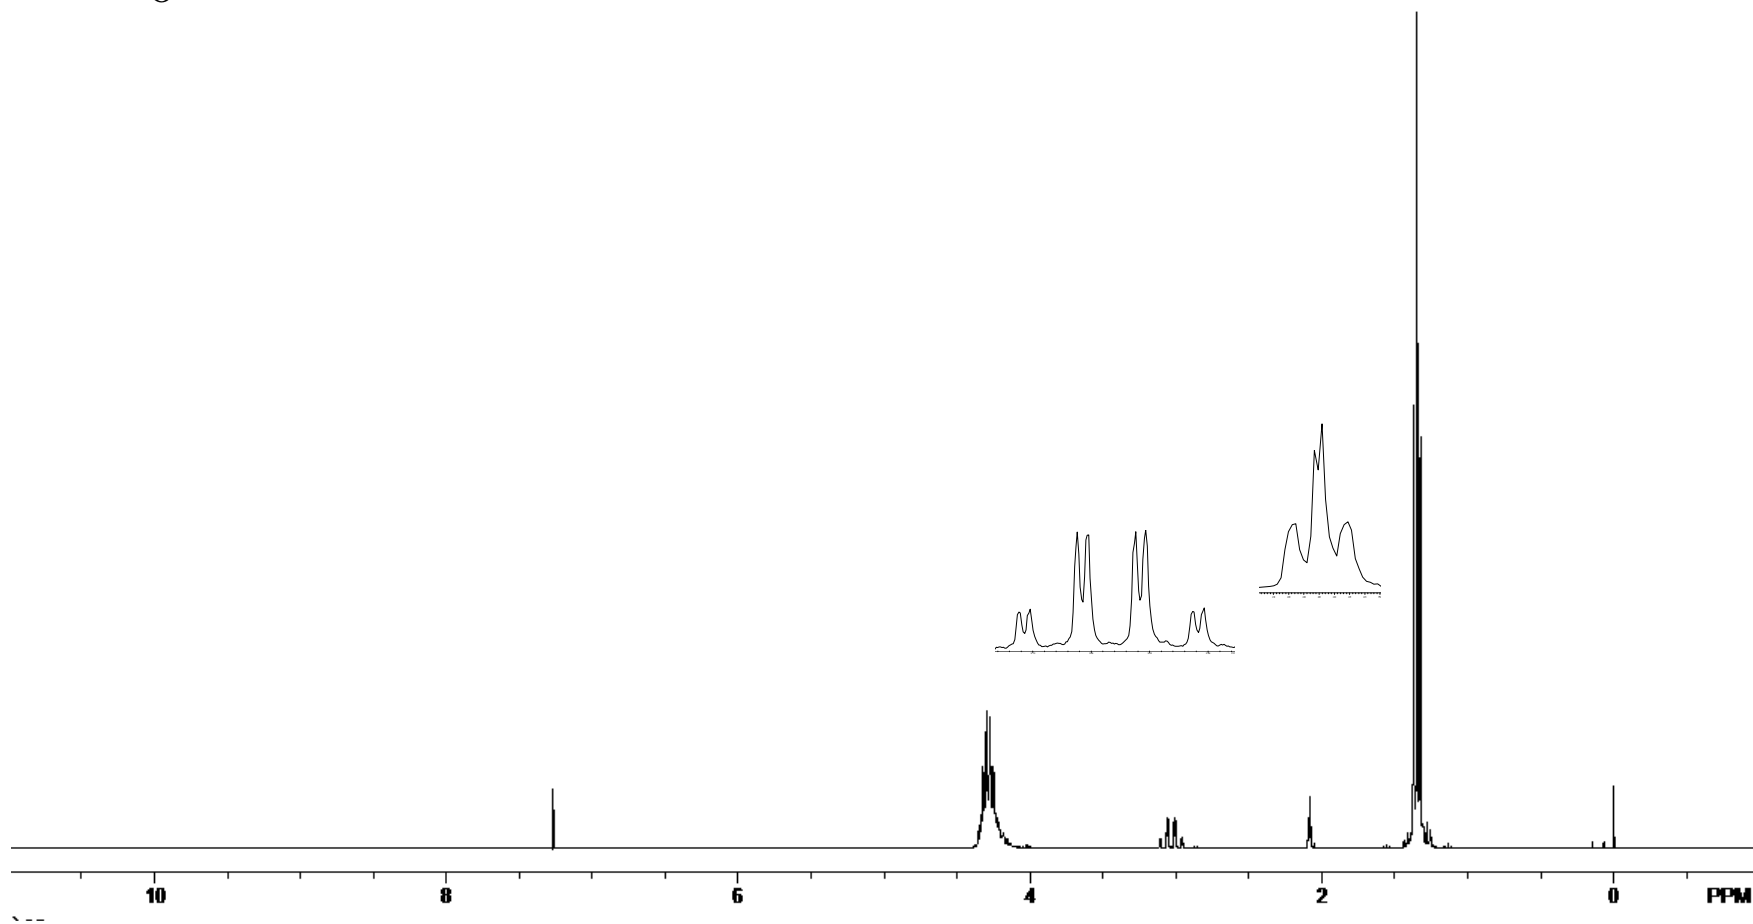

300 MHz  $^1\text{H}$  NMR spectrum of 3-butyn-1-ylidynetrisphosphonic acid, hexaethyl ester (**16**).

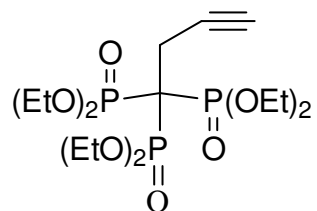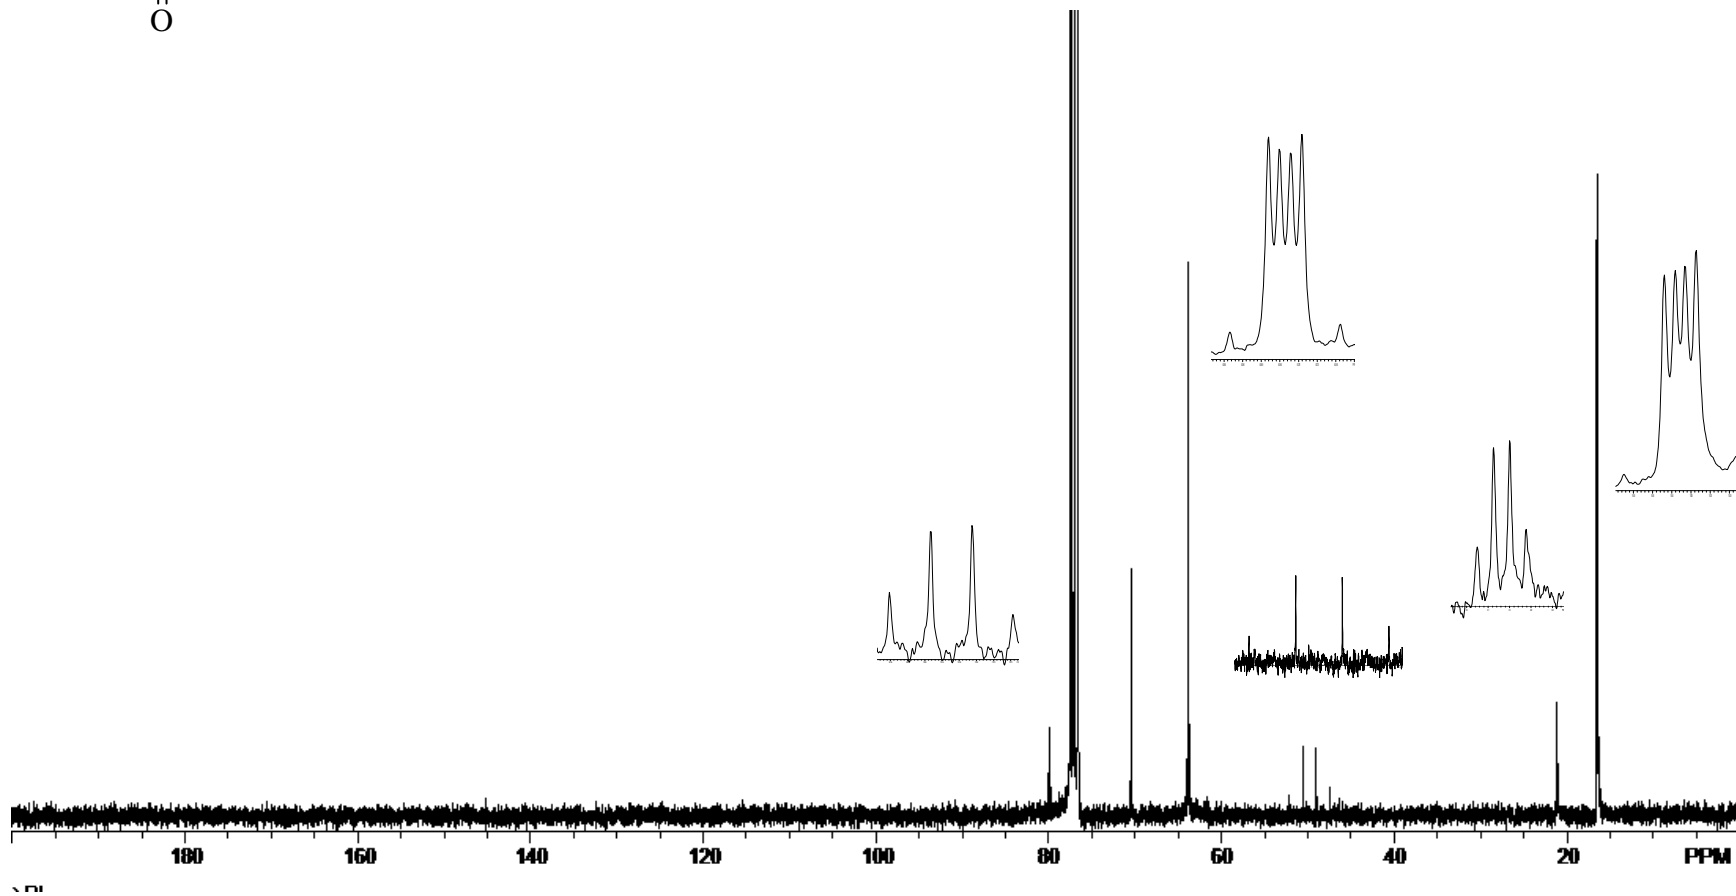

75 MHz  $^{13}\text{C}$  NMR spectrum of 3-butyn-1-ylidynetrisphosphonic acid, hexaethyl ester (**16**).

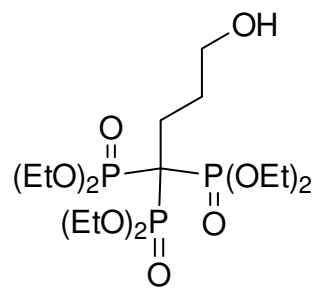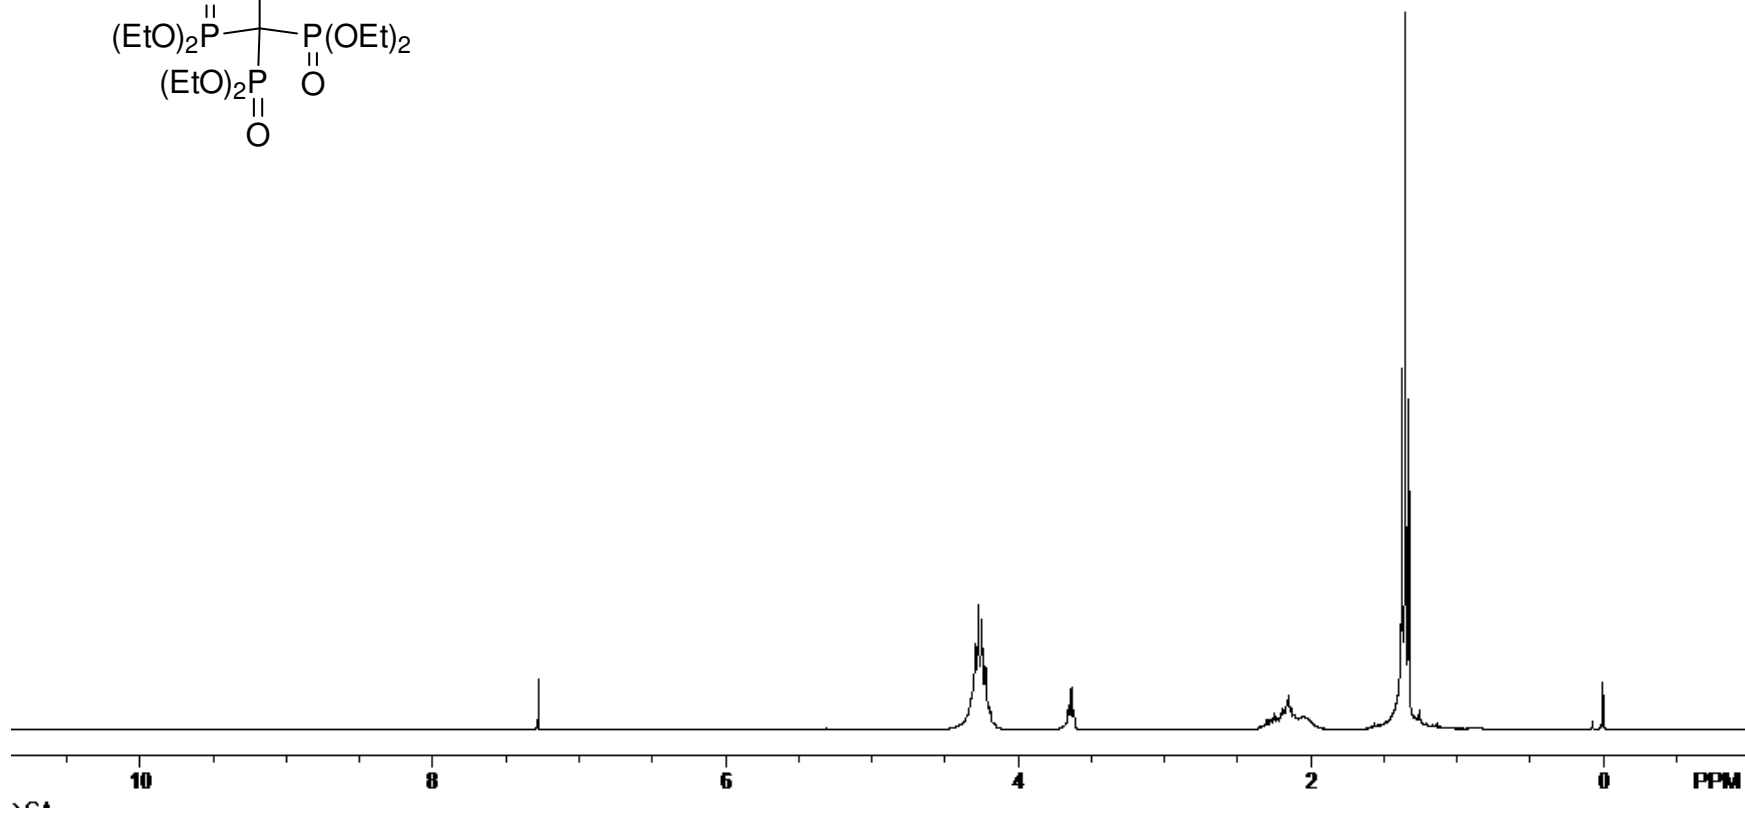

300 MHz  $^1\text{H}$  NMR spectrum of 4-hydroxybutylidynetrisphosphonic acid, hexaethyl ester (**19**).

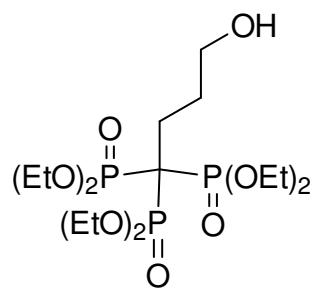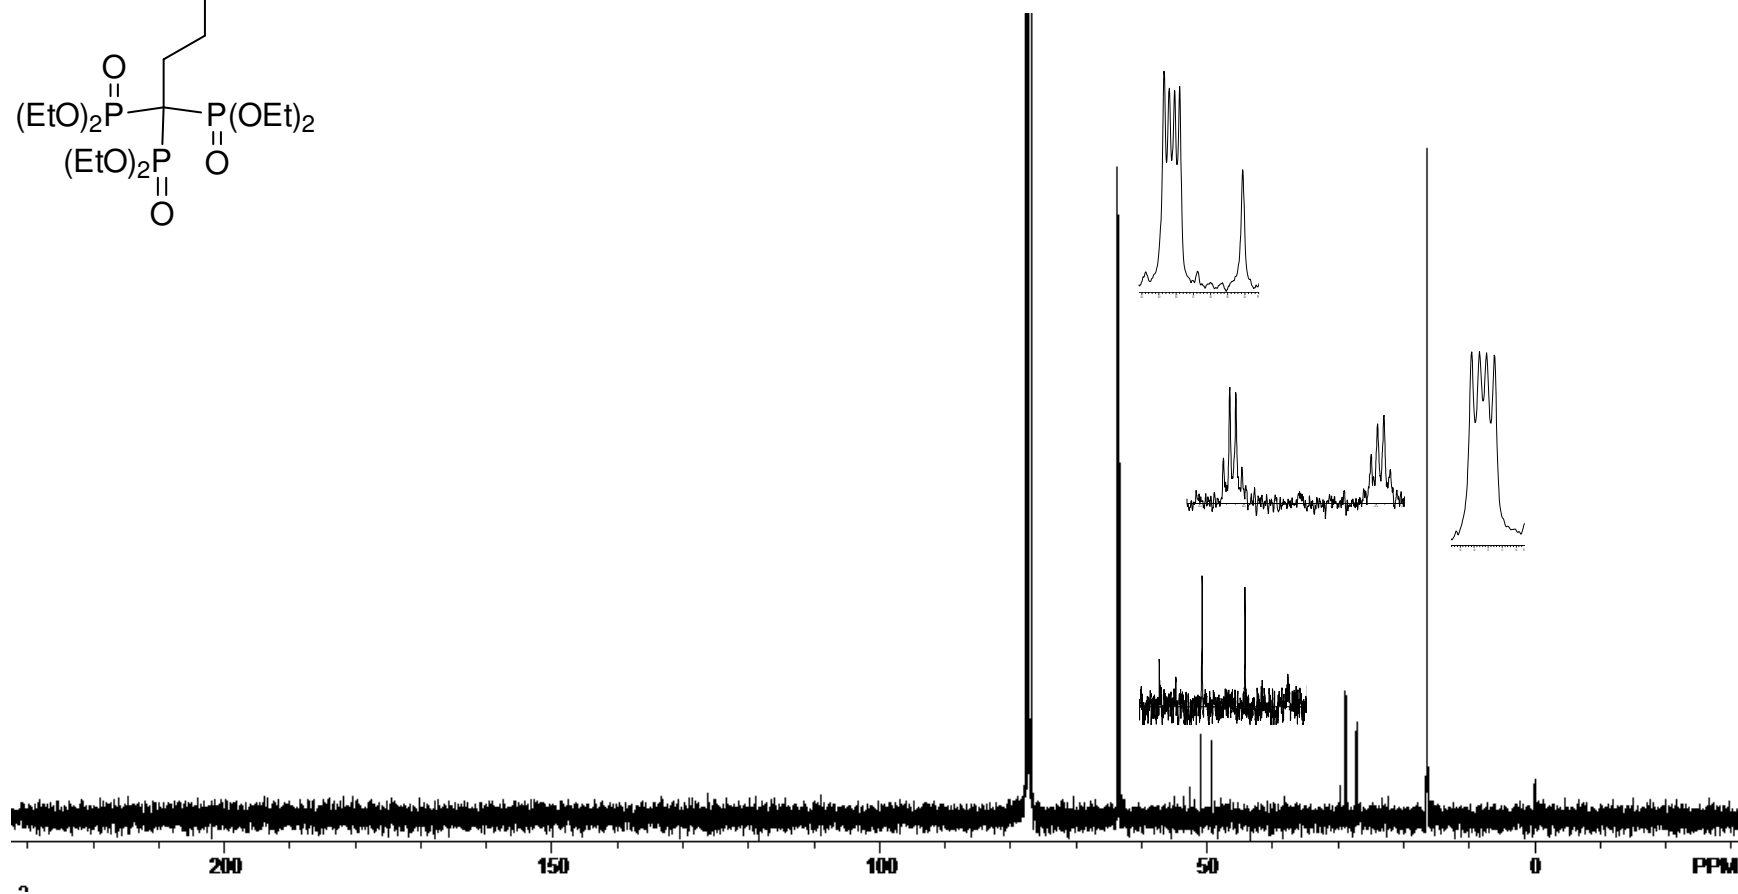

75 MHz  $^{13}\text{C}$  NMR spectrum of 4-hydroxybutylidynetrisphosphonic acid, hexaethyl ester (**19**).

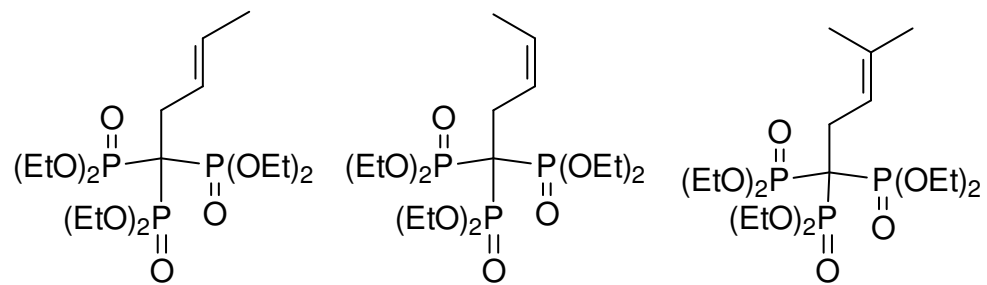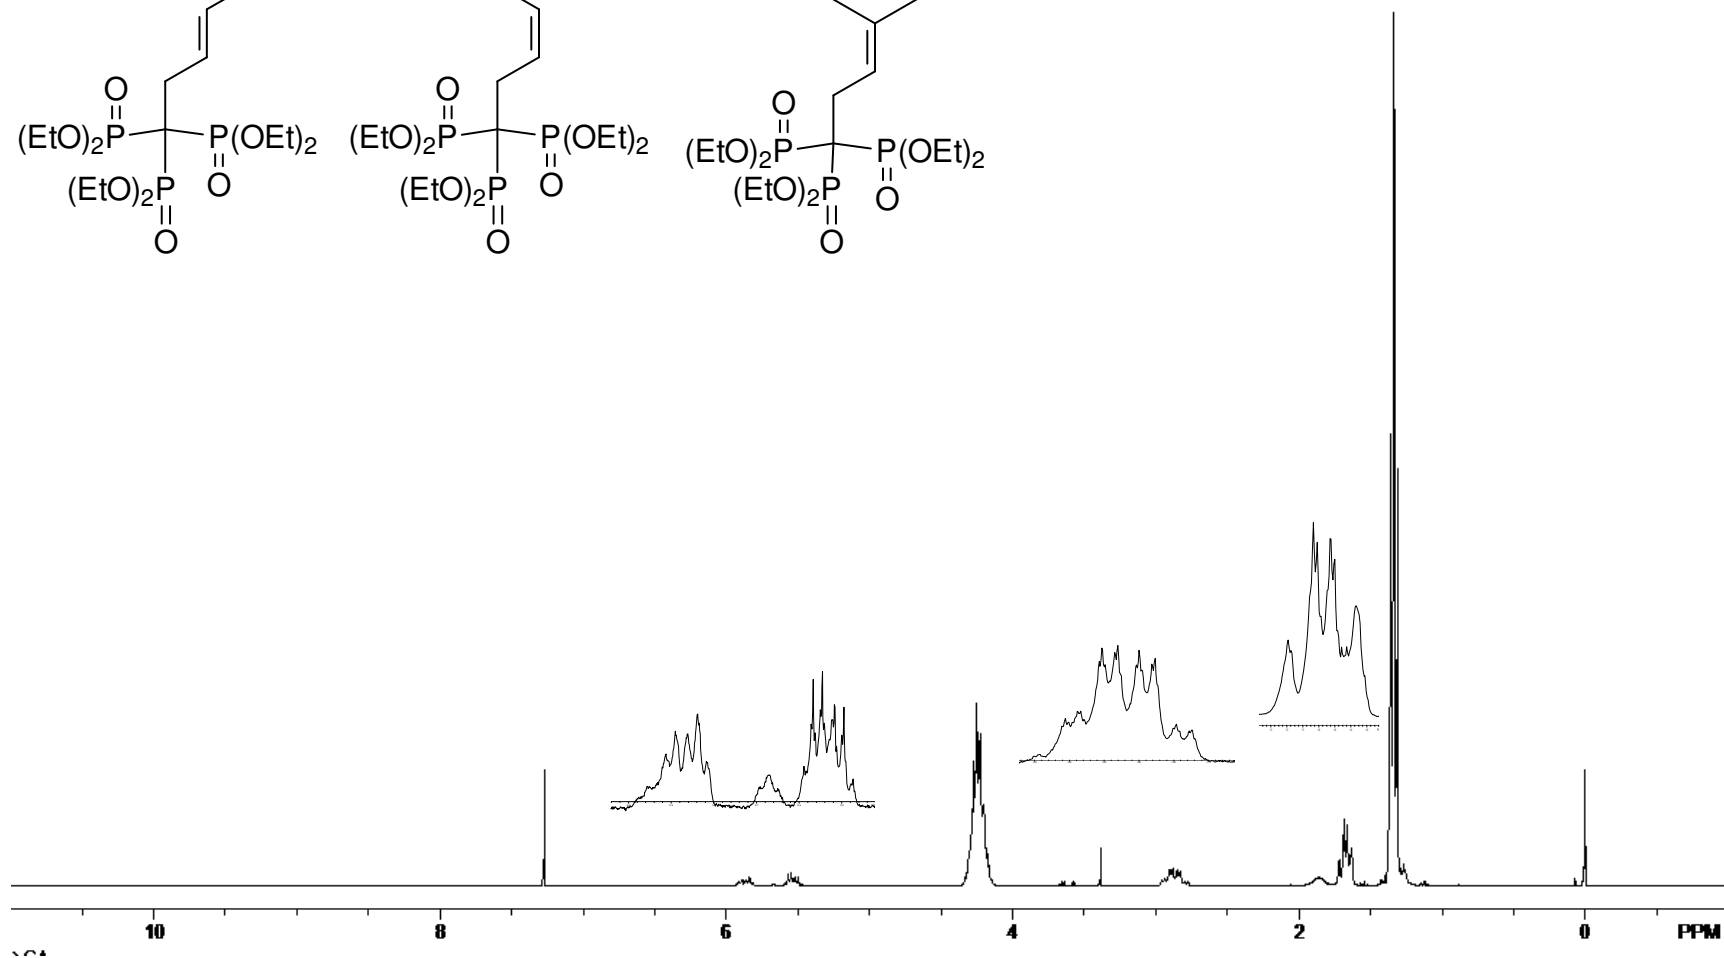

300 MHz  $^1\text{H}$  NMR spectrum of 3-pentenylidynetrisphosphonic acid, hexaethyl ester (**20**) and compound **12**

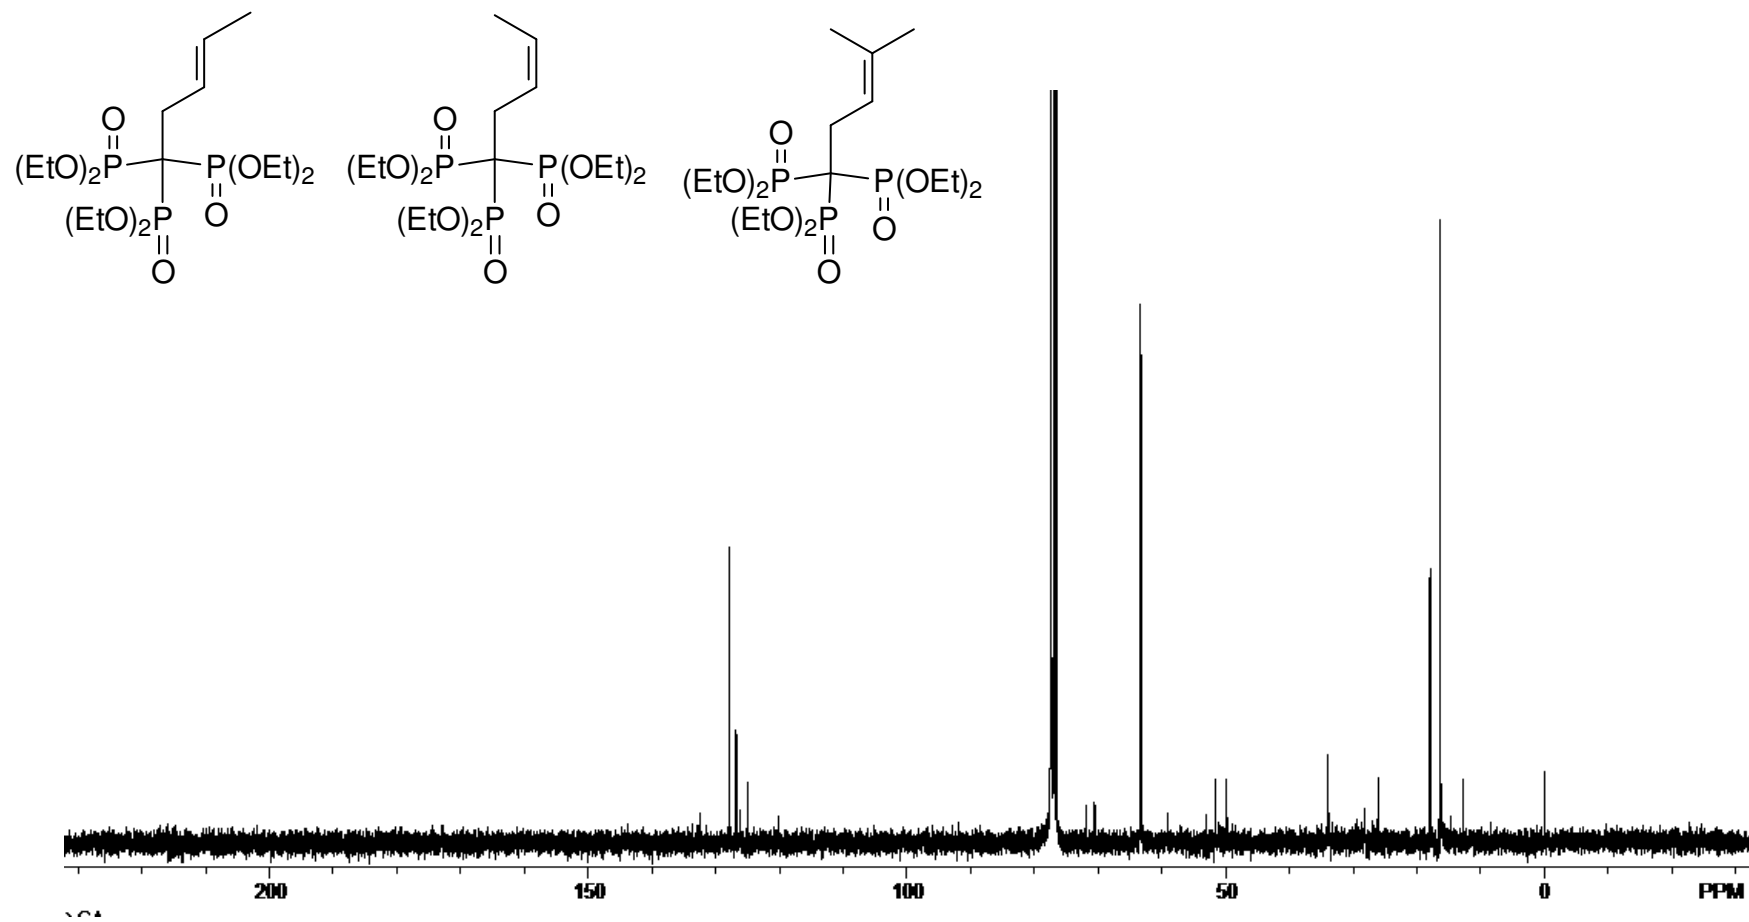

75 MHz  $^{13}\text{C}$  NMR spectrum of 3-pentenylidynetrisphosphonic acid, hexaethyl ester (**20**) and compound **12**.

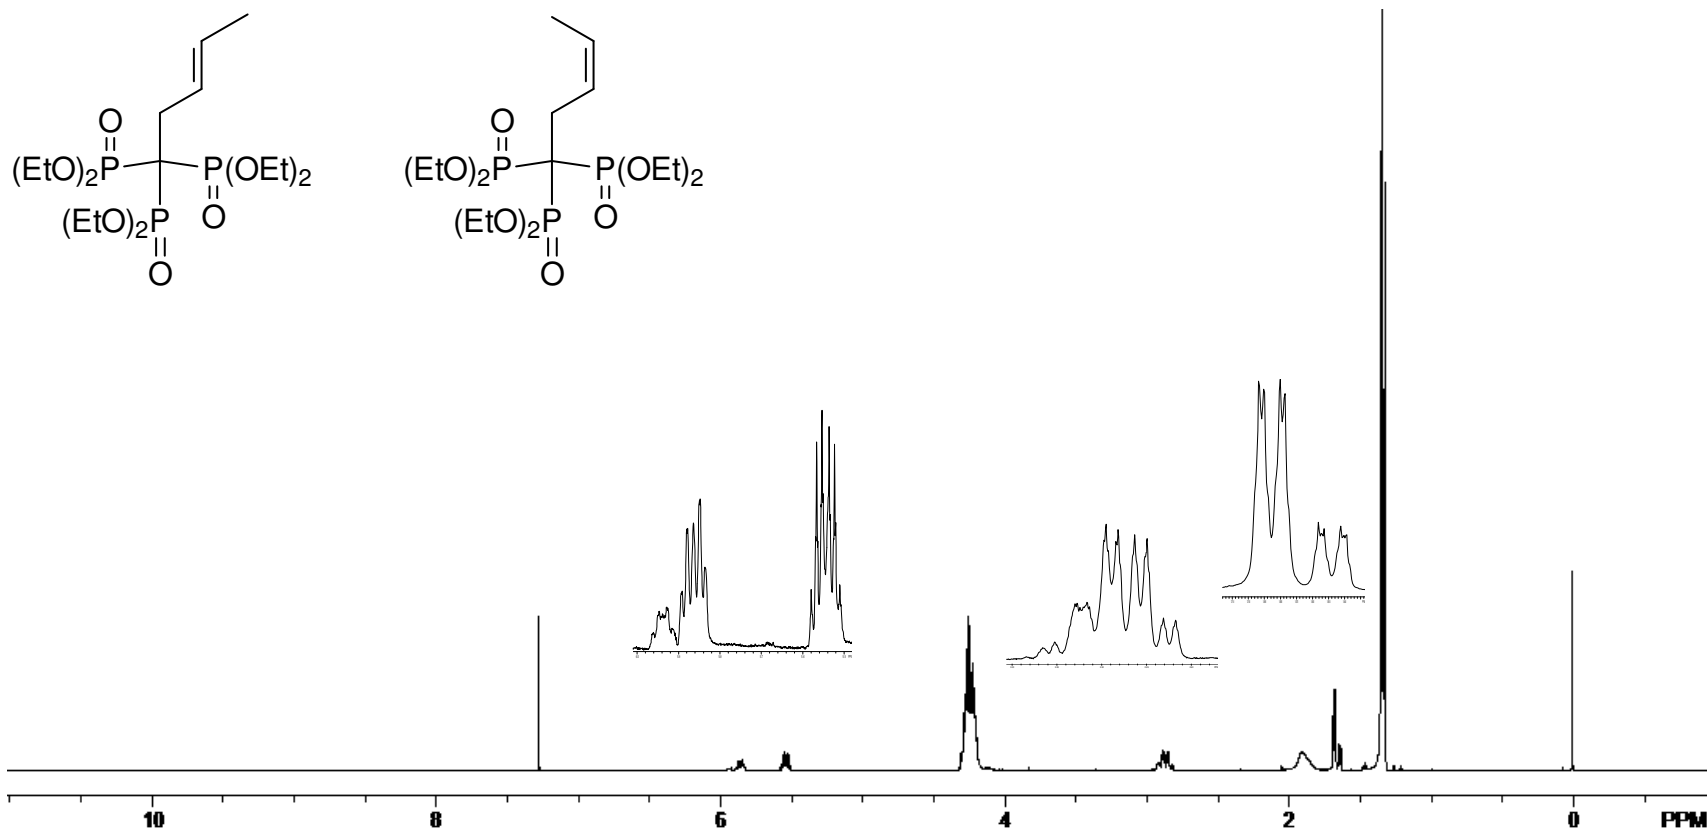

500 MHz <sup>1</sup>H NMR spectrum of 3-pentenylidynetrisphosphonic acid, hexaethyl ester (**20**).



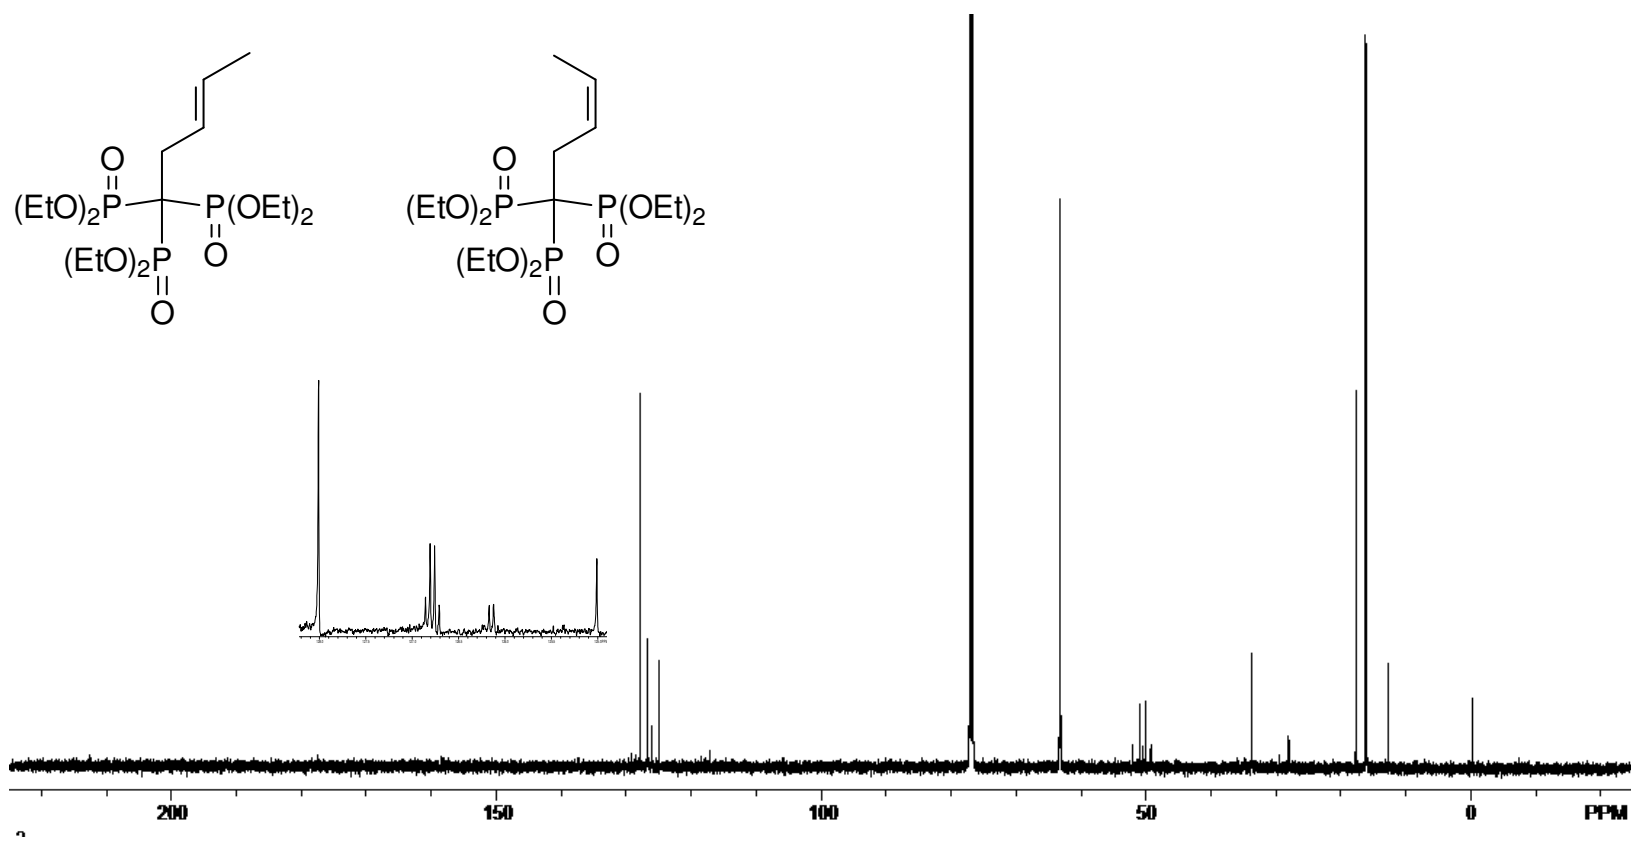

125 MHz  $^{13}\text{C}$  NMR spectrum of 3-pentenylidynetrisphosphonic acid, hexaethyl ester (**20**).



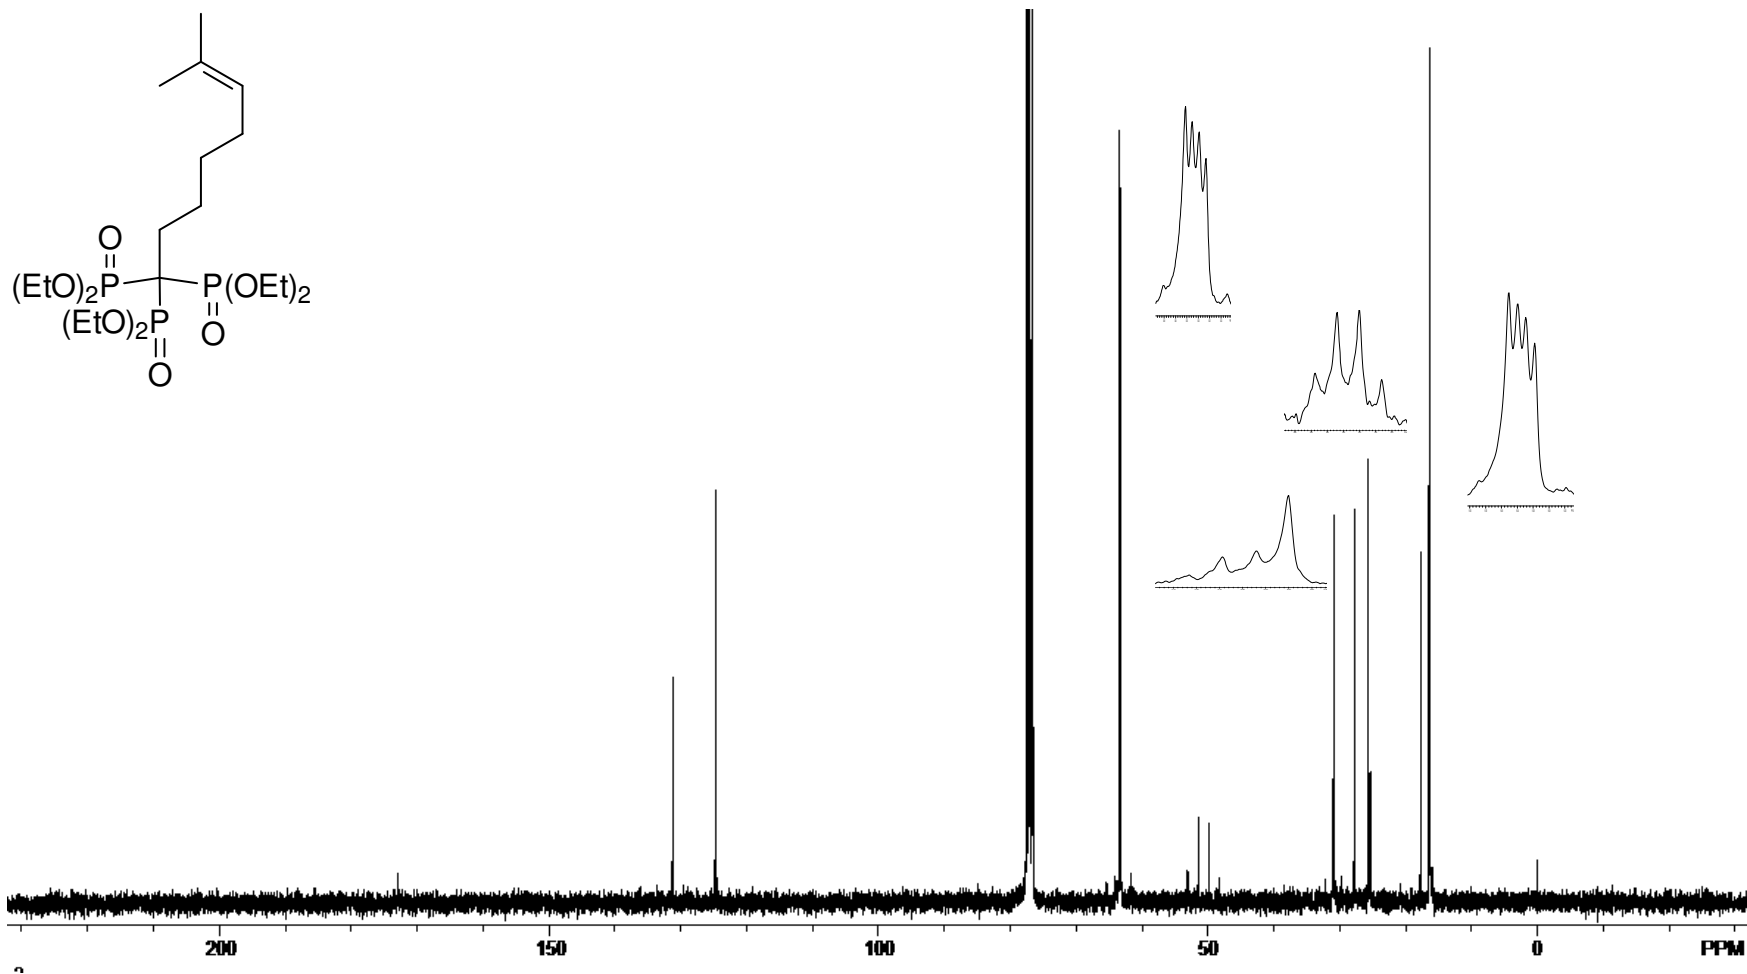

75 MHz  $^{13}\text{C}$  NMR spectrum of 7-methyl-6-octenyldynetrphosphonic acid, hexaethyl ester (**21**).

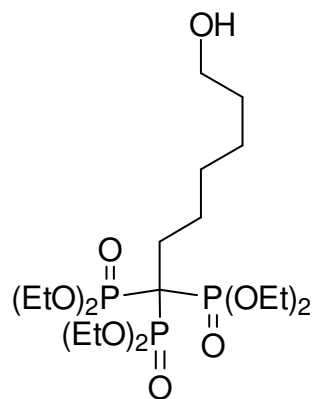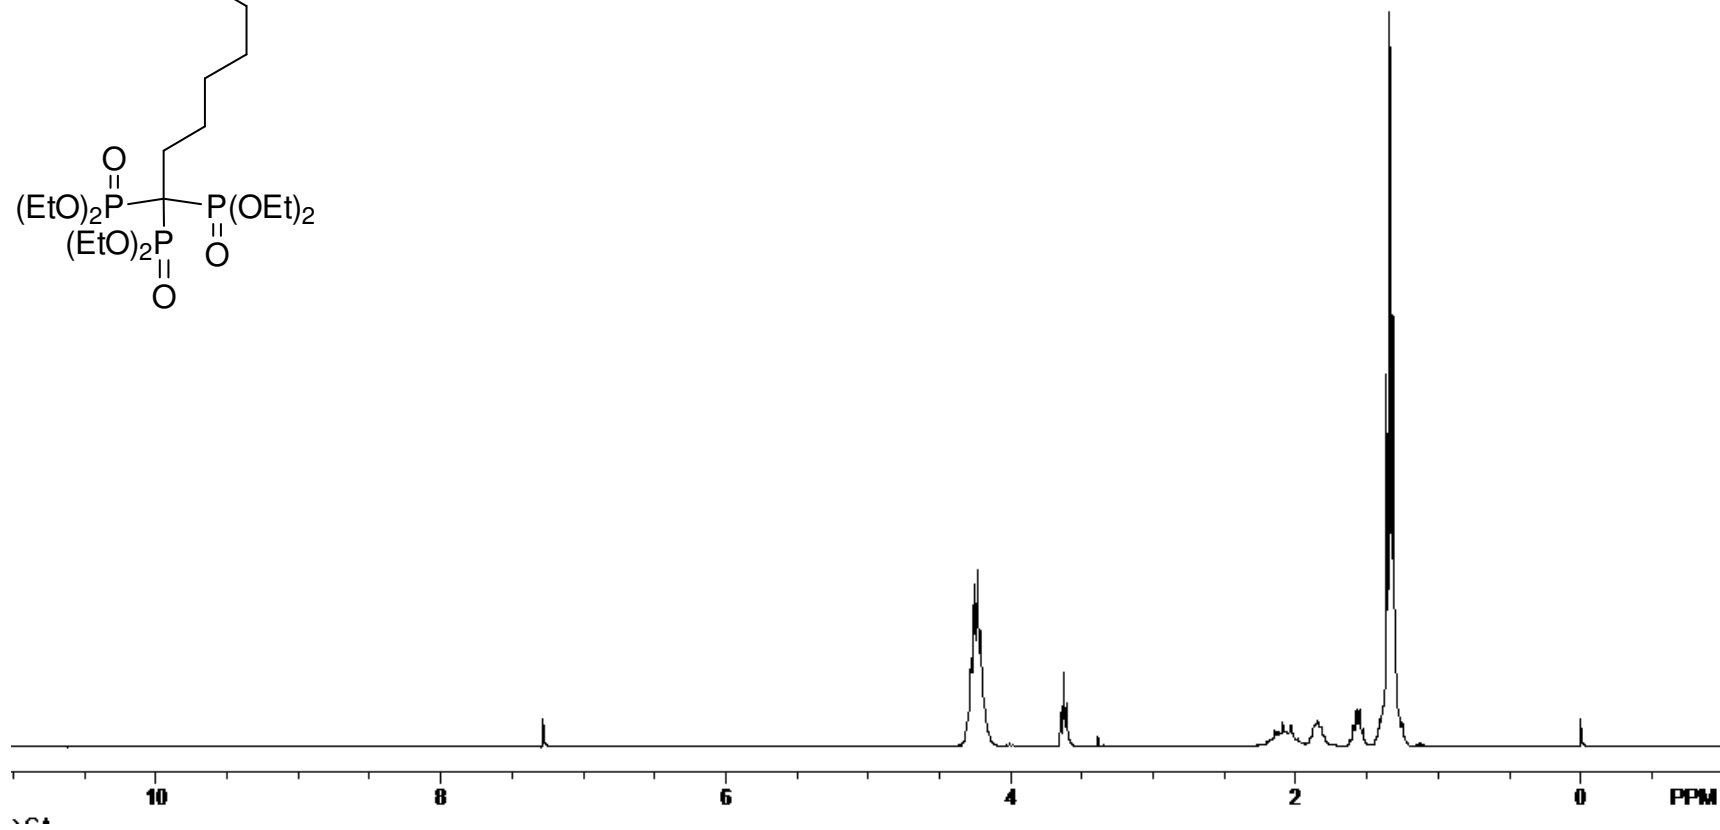

300 MHz <sup>1</sup>H NMR spectrum of 7-hydroxyheptylidynetrisphosphonic acid, hexaethyl ester (**22**).

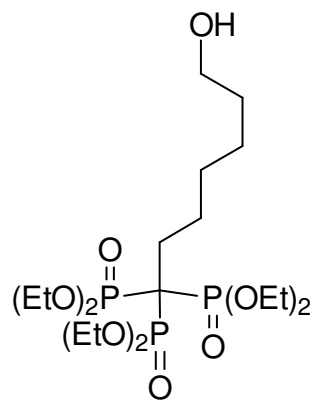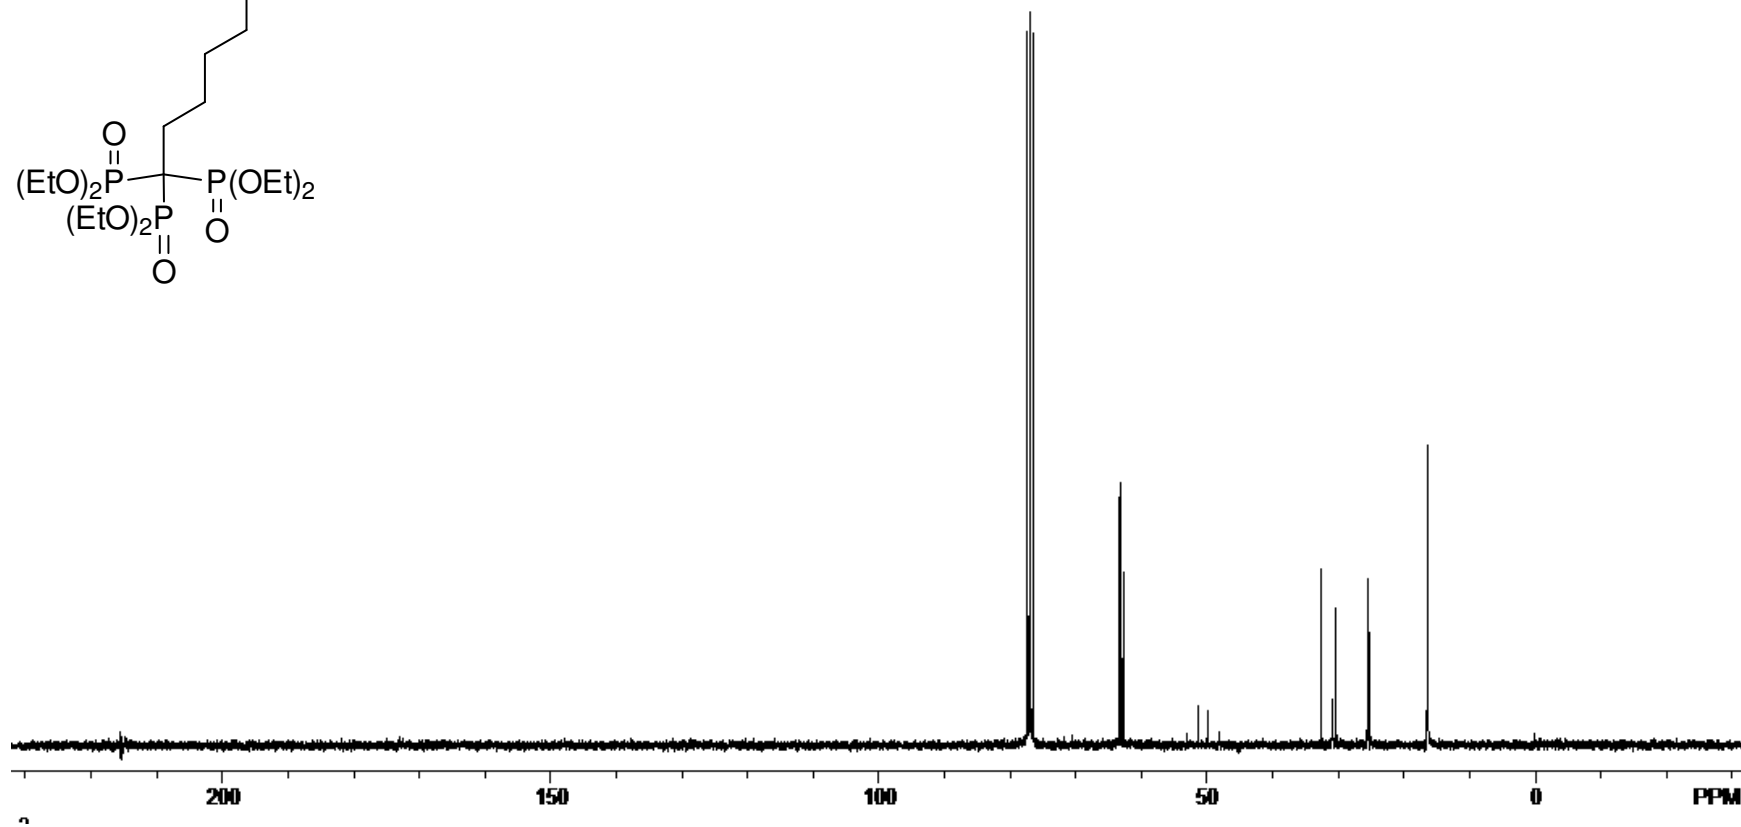

75 MHz <sup>13</sup>C NMR spectrum of 7-hydroxyheptylidynetrisphosphonic acid, hexaethyl ester (**22**).

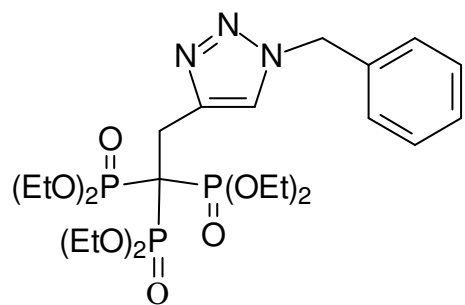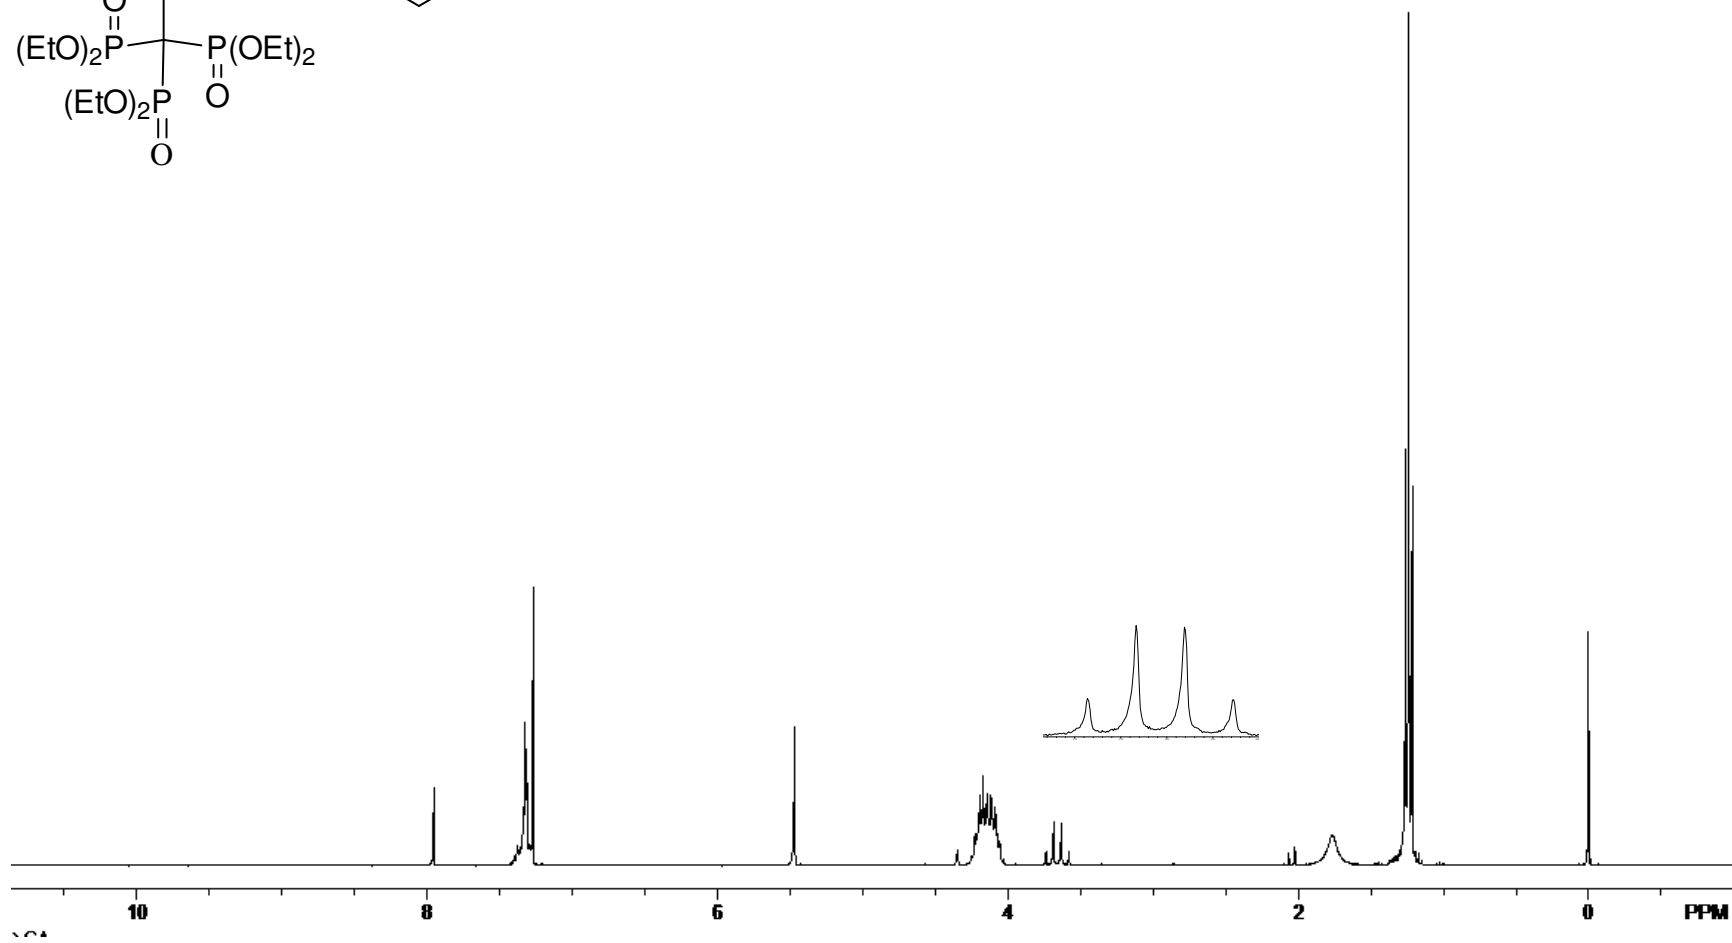

300 MHz <sup>1</sup>H NMR spectrum of 1-benzyl-4-[2,2,2-tris(diethoxyphosphinyl)ethyl]-1H-1,2,3-triazole (**23**).

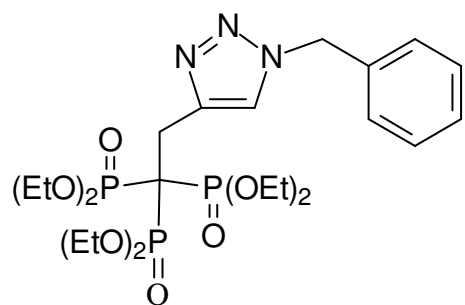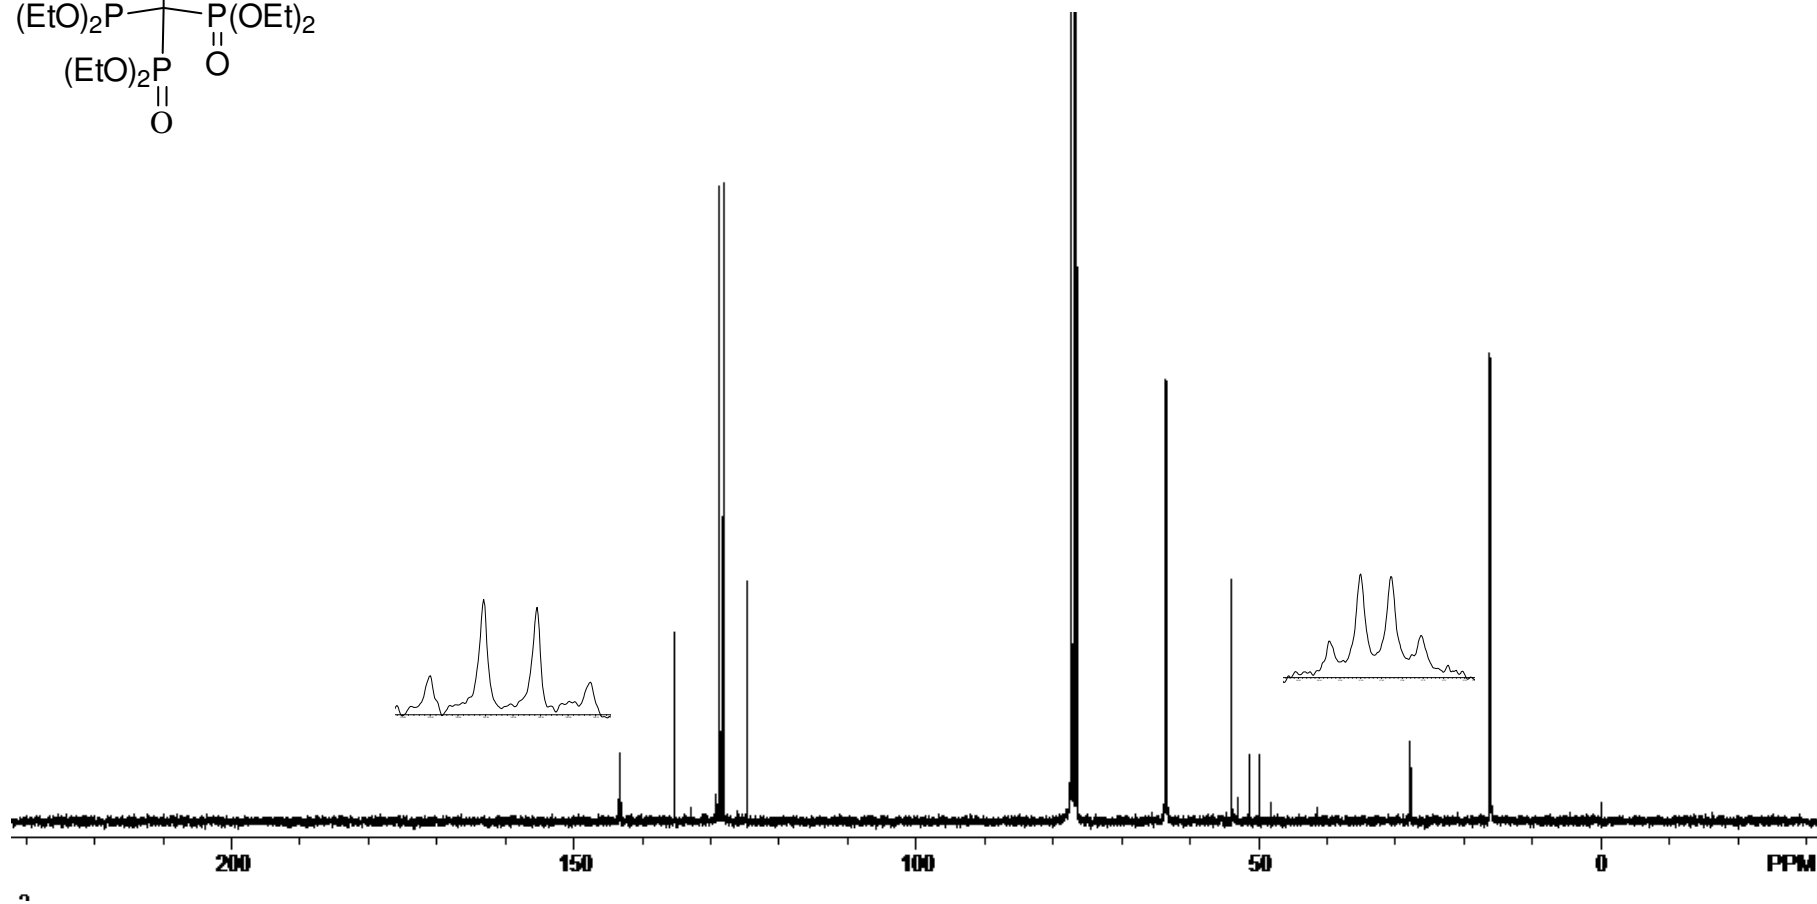

75 MHz  $^{13}\text{C}$  NMR spectrum of 1-benzyl-4-[2,2,2-tris(diethoxyphosphiny)ethyl]-1H-1,2,3-triazole (**23**).

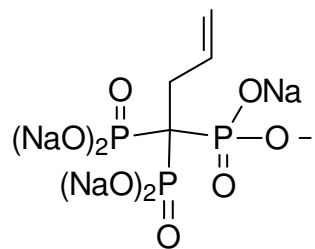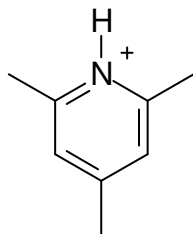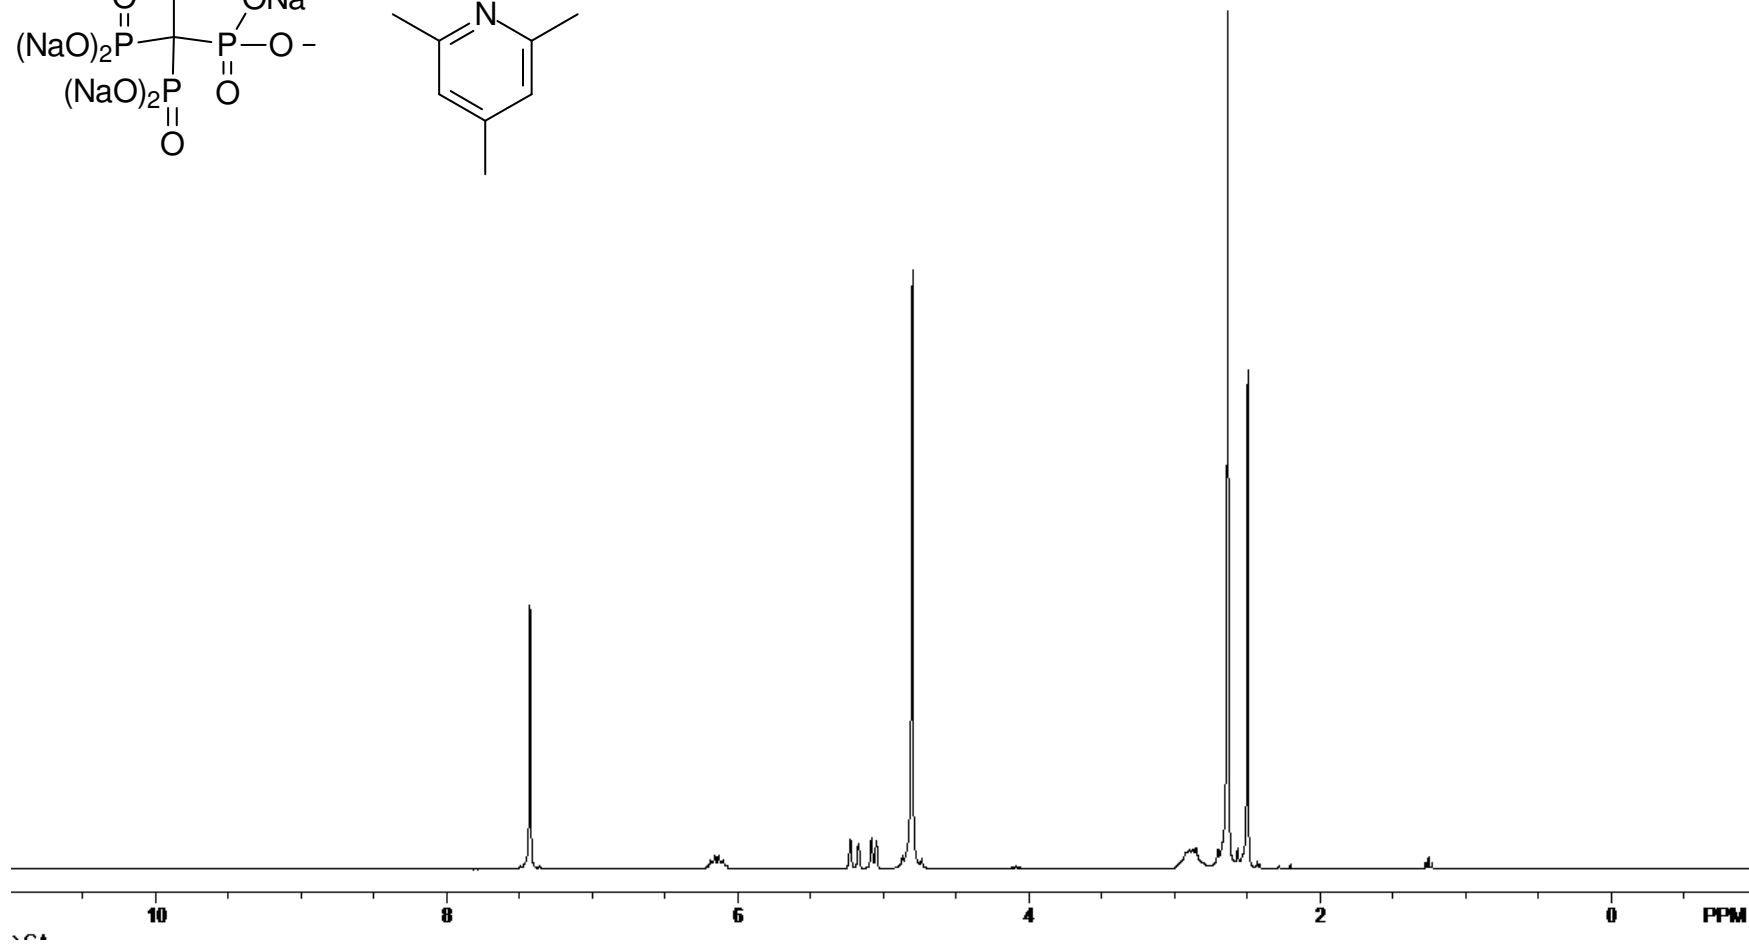

300 MHz <sup>1</sup>H NMR spectrum of 3-butenyldynetrtrisphosphonic acid, pentasodium, 2,4,6-trimethylpyridinium salt (**24**) (in D<sub>2</sub>O).



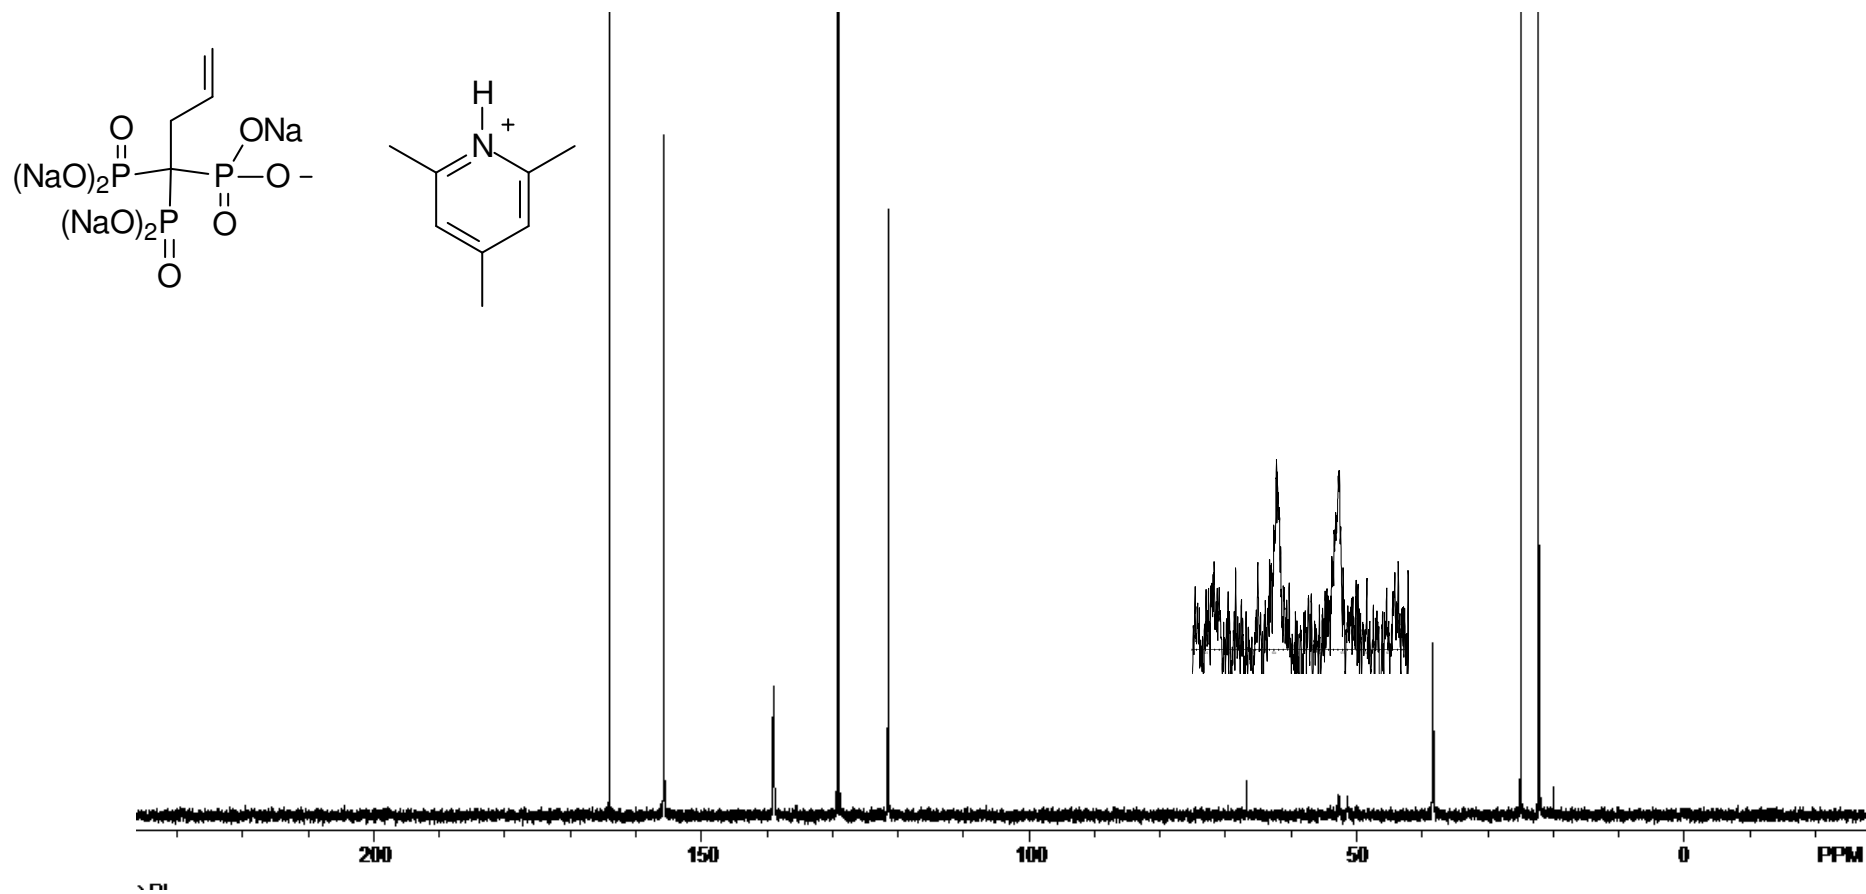

75 MHz <sup>13</sup>C NMR spectrum of 3-butenylidynetrisphosphonic acid, pentasodium, 2,4,6-trimethylpyridinium salt (**24**) (in D<sub>2</sub>O with 1,4-dioxane as an internal standard at 67.0 ppm).

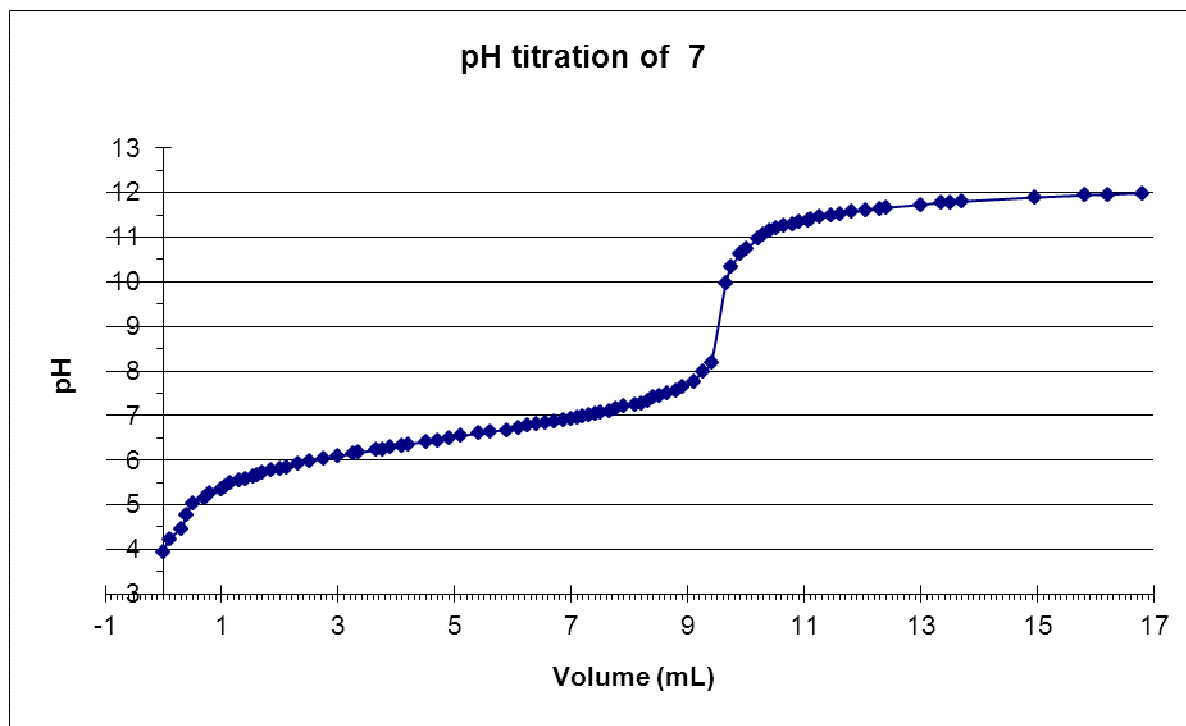

pH Titration of Compound 7 with NaOH.
